**MTCL2 promotes asymmetric microtubule organization  
by crosslinking microtubules on the Golgi membrane**

Risa Matsuoka<sup>†</sup>, Masateru Miki<sup>†</sup>, Sonoko Mizuno,  
Yurina Ito, Chihiro Yamada, Atsushi Suzuki\*

Molecular Cellular Biology Laboratory, Yokohama City University Graduate School of  
Medical Life Science, 1-7-29 Suehiro-cho, Tsurumi-ku, Yokohama 230-0045, Japan

<sup>†</sup> These authors contributed to this work equally.

\* Corresponding author: Atsushi Suzuki

1-7-29, Suehiro-cho, Tsurumi-ku, Yokohama 230-0045, Japan

TEL: 045-508-7238; E-mail: [abell@yokohama-cu.ac.jp](mailto:abell@yokohama-cu.ac.jp)

Running title: Microtubule cross-linking on the Golgi

Keywords: MTCL1, SOGA, Golgi ribbon, microtubule, polarity

1 **Abstract**

2

3 The Golgi complex plays an active role in organizing asymmetric microtubule arrays  
4 essential for polarized vesicle transport. The coiled-coil protein MTCL1 stabilizes  
5 microtubules nucleated from the Golgi membrane. Here, we report an MTCL1 paralog,  
6 MTCL2, which preferentially acts on the perinuclear microtubules accumulated around  
7 the Golgi. MTCL2 associates with the Golgi membrane through the N-terminal coiled-  
8 coil region and directly binds microtubules through the conserved C-terminal domain  
9 without promoting microtubule stabilization. Knockdown of MTCL2 significantly  
10 impaired microtubule accumulation around the Golgi as well as the compactness of the  
11 Golgi ribbon assembly structure. Given that MTCL2 forms parallel oligomers through  
12 homo-interaction of the central coiled-coil motifs, our results indicate that MTCL2  
13 promotes asymmetric microtubule organization by crosslinking microtubules on the  
14 Golgi membrane. Results of *in vitro* wound healing assays further suggest that this  
15 function of MTCL2 enables integration of the centrosomal and Golgi-associated  
16 microtubules on the Golgi membrane, supporting directional migration. Additionally,  
17 the results demonstrated the involvement of CLASPs and giantin in mediating the Golgi  
18 association of MTCL2.

19

20

21

## Introduction

22

23 The microtubule (MT) cytoskeleton plays an essential role in organizing intracellular  
24 structures by mediating the transport and positioning of organelles. Generally, animal  
25 cells radiate MTs from the centrosome, where MT nucleation and attachment of MT  
26 minus ends occur predominantly (Vorobjev & Nadezhdina, 1987; Conduit *et al*, 2015).  
27 However, accumulating evidence has demonstrated that cultured cells also develop non-  
28 centrosomal MTs that nucleate from or attach their minus ends to the Golgi membrane  
29 (Wu *et al*, 2016; Efimov *et al*, 2007; Rivero *et al*, 2009; Nishita *et al*, 2017; Meiring *et*  
30 *al*, 2020). In contrast to centrosomal MTs, which exhibit dynamic instability at their  
31 plus ends, Golgi-associated MTs are specifically stabilized (Chabin-Brion *et al*, 2001;  
32 Bartolini & Gundersen, 2006; Rivero *et al*, 2009) and connect the individual Golgi  
33 stacks laterally (Miller *et al*, 2009). This connection leads to the formation of  
34 vertebrate-specific, crescent-like assembly of Golgi stacks, called the Golgi ribbon  
35 (Miller *et al*, 2009), required for the polarization of vesicle transport and directional  
36 migration (Miller *et al*, 2009; Wei & Seemann, 2010; Yadav *et al*, 2009a)

37 The molecular mechanisms by which Golgi-associated MTs nucleate from or attach  
38 their minus ends to the Golgi membrane have been studied extensively. CLASPs and  
39 AKAP450 promote microtubule nucleation from the Golgi membrane, whereas  
40 CAMSAPs are involved in the attachment of MT minus ends to the Golgi membrane  
41 (Rivero *et al*, 2009; Efimov *et al*, 2007; Wu *et al*, 2016; Wu & Akhmanova, 2017; Yang  
42 *et al*, 2017; Sanders & Kaverina, 2015). Until recently, however, the specific  
43 mechanism of stabilization of MTs was not well clarified. We identified a novel MT-  
44 regulating protein named microtubule crosslinking factor 1 (MTCL1) that specifically

45 condenses to the Golgi membrane (Sato *et al*, 2013, 2014). MTCL1 is a long coiled-coil  
46 protein with two MT-binding domains (MTBDs) at the N- and C-terminal regions (Fig.  
47 1A), the latter of which has a unique ability to stabilize the polymerization state of MTs  
48 (Abdul Kader *et al*, 2017; Sato *et al*, 2014, 2013). By associating with the Golgi  
49 membrane through the interaction with CLASPs and AKAP450, MTCL1 plays an  
50 essential role in the stabilization of Golgi-associated MTs through this C-MTBD  
51 activity. MTCL1 is suggested to form parallel dimers via the coiled-coil-rich region and  
52 crosslinks Golgi-associated MTs through N-MTBD lacking MT stabilizing activity  
53 (Abdul Kader *et al.*, 2017).

54 These MTCL1 functions are specifically utilized in vertebrates because  
55 invertebrate genomes do not encode proteins homologous to MTCL1. Contrastingly, a  
56 single paralog of MTCL1, named MTCL2, is encoded in vertebrate genomes (GenBank  
57 accession number: NM\_001164663). The deduced amino acid sequence of MTCL2  
58 showed significant homology with MTCL1 in the coiled-coil region and the C-MTBD  
59 but not in the N-MTBD (Fig. 1A, Fig. EV1). This result suggests that vertebrates  
60 exploit other MT-regulating proteins with similar, but not identical, activity to that of  
61 MTCL1. Contrary to this prediction, a shorter isoform of mouse MTCL2 lacking the  
62 203 N-terminal amino acids has already been reported as a suppressor of glucose from  
63 autophagy (SOGA) with completely different functions from those of MTCL1 (Fig. 1A)  
64 (Cowherd *et al*, 2010; Combs & Marliss, 2014). SOGA (now called SOGA1) is  
65 translated as a membrane-spanning protein and cleaved into two halves in the ER of  
66 hepatocytes (Cowherd *et al*, 2010). The resultant N-terminal fragment is released into  
67 the cytoplasm to suppress autophagy by interacting with the Atg5/Atg12/Atg16  
68 complex, whereas the C-terminal fragment is secreted after further cleavage (Fig. 1A).

69        In this study, we first analyzed the expression, subcellular localization, and  
70 functions of MTCL2 and demonstrated that uncleaved MTCL2 was expressed  
71 ubiquitously and functioned as a functional paralogue of MTCL1 in the cytosol.  
72 Structure-function analysis indicated that MTCL1 forms parallel oligomers through the  
73 central coiled-coil region and crosslinks MTs by direct interaction via the C-terminal  
74 region lacking MT-stabilizing activity. In contrast to MTCL1, the Golgi association  
75 region was distinctly confined to the N-terminal coiled-coil region, which interacted  
76 with CLASP2. The involvement of giantin in the association of MTCL2 with Golgi has  
77 also been suggested. Knockdown experiments revealed that these activities of MTCL2  
78 were required for MT accumulation around the Golgi and the clustering of Golgi stacks  
79 into a compact Golgi ribbon. *In vitro* wound healing assays further suggested a possible  
80 function of MTCL2 in integrating the centrosomal and Golgi-associated MTs around the  
81 Golgi ribbon, thus playing essential roles in directional migration. These results indicate  
82 the important roles of MTCL2 in asymmetrically organizing MTs based on the Golgi  
83 complex.  
84

85

## Results

86

### 87 **MTCL2 is expressed predominantly as a 180 kDa full-length uncleaved protein**

88

89 A mouse MTCL2 (mMTCL2) isoform lacking the 203 N-terminal amino acids,  
90 named SOGA1, was reported to be cleaved into several fragments on the ER (Fig. 1A)  
91 (Cowherd *et al*, 2010). If this processing occurs for full-length MTCL2, it cannot serve  
92 as a functional paralog of MTCL1. Thus, we first analyzed the molecular mass of  
93 MTCL2 in cultured cells using a commercially available anti-SOGA1 antibody,  
94 predicted to detect an ~80 kDa cleaved product derived from the MTCL2 N-terminus  
95 (Fig. 1A). Results of western blotting analysis of HEK293T cells transfected with an  
96 expression vector harboring full-length mMTCL2 cDNA with an N-terminal V5-tag  
97 sequence is shown in Fig. 1B. Under a low sensitive condition at which the anti-SOGA1  
98 antibody revealed no bands in the lanes of untransfected cells (see lanes indicated with  
99 “mock” or “HeLa-K extract”), a single major band corresponding to a molecular mass  
100 of approximately 200 kDa (Fig. 1B, right panel) was detected in the lane of V5-  
101 MTCL2-expressing cells. This molecular mass is close to the nominal molecular weight  
102 of 185.66 kDa predicted for the full-length mMTCL2 product. A similar band was  
103 detected using an anti-V5 antibody, indicating that this band corresponds to the major  
104 product derived from the transfected cDNA (Fig. 1B, left panel). Additionally, reactions  
105 with both antibodies yielded smeared bands corresponding to the molecular weights  
106 ranging from 100 to 180 kDa; however, no clear bands around 80 kDa were detected.  
107 Taken together, we concluded that full-length MTCL2 exogenously expressed in  
108 HEK293T cells was not subjected to significant intramolecular cleavage as previously

109 reported.

110 Next, we examined the molecular mass of endogenous MTCL2 in extracts from  
111 several cell lines, including a human liver cancer cell line, HepG2, using the same anti-  
112 SOGA1 antibody under higher sensitive conditions (Fig. 1C). Under these conditions, a  
113 major band corresponding to ~200 kDa was detected in the lanes of HeLa-K, HepG2,  
114 and RPE1 cells. These bands corresponded to a molecular mass similar to that of V5-  
115 mMTCL2 exogenously expressed in HEK293T cells and were not observed in the lanes  
116 of cells subjected to MTCL2 knockdown (Fig. 1C). Considering that the antibody did  
117 not cross-react with MTCL1 (Fig. 1B, right panel), these results demonstrated that the  
118 examined cell lines dominantly expressed full-length MTCL2. As shown in Fig. 1C,  
119 several minor bands corresponding to molecular masses lower than 200 kDa  
120 (arrowheads) were absent in knockdown cells, particularly in RPE1 cells (Fig. 2C),  
121 suggesting that they correspond to splicing isoforms or cleaved products of MTCL2.  
122 However, most of the bands corresponded to molecular masses greater than 100 kDa,  
123 and clear bands at ~80 kDa corresponding to the N-terminal cleavage product were not  
124 detected. Collectively, these results indicate that endogenous MTCL2 in these cell lines  
125 was not subjected to cleavage, as previously reported for SOGA1.

126 Western blotting analyses of various mouse tissue extracts also revealed a similar  
127 ~200 kDa band as a major band in lanes corresponding to the lung, testis, ovary,  
128 cerebrum, and cerebellum (Fig. 1D). Alternatively, weak signals around 80 kDa were  
129 detected for some tissues, such as the pancreas, liver, and muscles (arrowheads).  
130 Therefore, we cannot exclude the possibility that MTCL2 is subjected to the reported  
131 cleavage and functions as a SOGA in these tissues. However, our results are consistent  
132 with the notion that MTCL2 is a functional paralog of MTCL1 and ubiquitously serves

133 as an MT-regulating protein in the cytosol.

134

135 **MTCL2 predominantly localizes to the perinuclear MTs accumulating around the**  
136 **Golgi complex**

137

138 Next, we examined the subcellular localization of MTCL2 in HeLa-K cells.  
139 Reaction with the anti-SOGA1 antibody yielded granular signals in the cytoplasm (Fig.  
140 2A), which were particularly condensed near the perinuclear region where the Golgi  
141 ribbons are located and MTs accumulate (inset I in top panels Fig. 2A). They  
142 completely disappeared in MTCL2-knockdown cells (Fig. 5), and the same staining  
143 patterns were obtained independent of the fixation conditions (Fig. EV2). These results  
144 indicate that the immunostaining signals observed herein revealed the genuine  
145 localization of endogenous MTCL2. Further analysis indicated that most MTCL2  
146 signals in this perinuclear region were detected on MTs, and some overlapped with the  
147 Golgi marker signals (middle panels in Fig. 2A). Colocalization of MTCL2 with MTs  
148 was also observed in the peripheral regions (inset II in top panels), where the densities  
149 of MTCL2 signals were rather low (bottom panels in Fig. 2A and Fig. 2B).

150 To further confirm the above results, we examined the subcellular localization of  
151 exogenously expressed MTCL2 using an anti-tag antibody. When highly expressed in  
152 HeLa-K cells, exogenous MTCL2 induced the formation of thick MT bundles and  
153 frequently disrupted the normal crescent-like Golgi ribbon structures into dispersed  
154 ones (arrows in Appendix Fig. S1). However, when the expression levels were similar to  
155 the endogenous levels, exogenous MTCL2 mimicked endogenous MTCL2 in terms of  
156 subcellular localization, by accumulating on one side of the perinuclear region where



157 the Golgi ribbons localize and MTs accumulate (yellow arrowheads in Appendix Fig.  
158 S1). Colocalization of exogenously expressed MTCL2 with MTs in the peripheral  
159 region was also confirmed in the low-expression conditions (Fig. 2C).

160 Since the above results were similar to those reported for MTCL1 (Sato *et al*,  
161 2014), we directly compared them (Fig. 2D). As expected, MTCL1 and 2 exhibited a  
162 significantly similar distribution pattern in the cytoplasm, with intermittent localization  
163 on the MT lattices and preferential condensation on the perinuclear MTs accumulated  
164 around the Golgi. These features were highlighted when their distribution patterns were  
165 compared with those of another MT lattice-binding protein, MAP4 (Chapin & Bulinski,  
166 1991). Unlike MTCL1 and 2, MAP4 was evenly distributed along MTs, without a  
167 strong preference for perinuclear MTs. In the peripheral regions, we could predict  
168 directions of each MT filament running in this area from MAP4 signals exhibiting linear  
169 arrangements. However, immunofluorescence signals of MTCL1 and 2 were too sparse  
170 to enable us to do this prediction (bottom panels in Fig. 2D). These results support the  
171 notion that MTCL1 and 2 form a unique family of MT-regulating proteins.

172

### 173 **MTCL2 interacts with MTs via the C-terminal conserved region**

174

175 To determine the molecular basis of the subcellular localization of MTCL2, we  
176 subdivided the molecule into three fragments (N, M, and C in Fig. 3A) and examined  
177 their localization in HeLa-K cells (Fig. 3B). As expected, the C fragment containing the  
178 region corresponding to MTCL1 C-MTBD (hereafter referred to as the KR-rich region;  
179 Fig. 1A, Fig. EV1C) exhibited clear localization on the MT lattice (top and the right  
180 panels in Fig. 3B). Direct binding of the C-terminal region with MTs was confirmed

181 using a shorter fragment of MTCL2 (CT1) that still contained the KR-rich region (Fig.  
182 3A): CT1 fused with maltose-binding protein (MBP), but not MBP alone, co-  
183 sedimented with MTs *in vitro* when purified from *Escherichia coli* and mixed with  
184 taxol-stabilized MTs (Fig. 3C). The KR-rich region alone also exhibited localization on  
185 MTs (Fig. 3D, Fig. EV3B), whereas deletion of the KR-rich region impaired  
186 localization of full-length MTCL2 on MTs (MTCL2  $\Delta$ KR in Fig. EV3A). Together with  
187 the results that the N and M fragments did not colocalize with MTs (Fig. 3B), these  
188 results indicate that MTCL2 has a single MT-binding region at the C-terminus, as  
189 predicted from the sequence comparison between MTCL1 and 2 (Fig. EV1).

190 We have previously shown that the C-MTBD of MTCL1 has MT-stabilizing activity  
191 (Sato *et al*, 2014; Abdul Kader *et al*, 2017). This activity can be monitored by its ability  
192 to strongly increase acetylated tubulin signals as well as to secondarily induce MT  
193 bundles when expressed in HeLa-K cells (Fig. EV3B). We noticed that the KR-rich  
194 region of MTCL2 did not show these activities strongly (Fig. EV3B). These results  
195 suggest that the sequence divergence from MTCL1 (Fig. EV1C) weakened the MT-  
196 stabilizing activity of the MT-binding region of MTCL2 and made it similar to MTCL1  
197 N-MTBD, which induced MT bundles only when it was connected to the central coiled-  
198 coil region (Abdul Kader *et al*, 2017). To assess this possibility, we first examined  
199 homo-interaction of the coiled-coil region of MTCL2 by using N and M fragments  
200 tagged with streptavidin-binding peptide (SBP) or V5 peptide. When the fragments with  
201 a different tag were expressed in HEK293T cells in various combinations, homo- but  
202 not hetero-interactions were detected for the N and M fragments in pull-down  
203 experiments using streptavidin-conjugated resin (Fig. 3E). This finding indicated that  
204 the central coiled-coil region of MTCL2 mediated parallel oligomerization of MTCL2,

205 similar to MTCL1. Figure 3F demonstrates that the C fragment expressed in HeLa-K  
206 cells acquired strong MT-bundling activity when fused with the M fragment. These  
207 results support the notion that MTCL2 mainly functions as an MT crosslinking protein  
208 by directly interacting with MTs via the C-terminus and forming parallel oligomers via  
209 the central coiled-coil region.

210

### 211 **MTCL2 associates with the Golgi apparatus via the N-terminal coiled-coil region**

212

213 As for MTCL1, we failed to identify the region responsible for its Golgi association  
214 activity (unpublished results). However, unexpectedly, a strong association between the  
215 N fragment of MTCL2 and the Golgi membrane was observed (bottom panels in Fig.  
216 3B). This finding contrasted sharply with the results that the M fragment distributed  
217 diffusely without showing any discrete localizations by itself (middle panels in Fig. 3B),  
218 suggesting that MTCL2 is associated with MTs and the Golgi membrane separately  
219 through the C- and N-terminal regions, respectively. Considering that the C fragment  
220 did not exhibit preferential localization to the perinuclear region (top panels in Fig. 3B),  
221 this dual binding activity of MTCL2 may enable the exhibition of preferential  
222 association with the perinuclear MTs around the Golgi apparatus.

223 To identify mutations that disrupt the Golgi association of the N fragment, we first  
224 performed deletion mapping of a region responsible for this Golgi-association activity  
225 and found that the most N-terminal region highly diverged from MTCL1 was  
226 dispensable (N $\Delta$ N in Fig. 4A, Fig. EV1). However, subsequent analysis did not allow us  
227 to confine the responsible region narrower than 431 amino acids covering the six N-  
228 terminal CC motifs (CC1–CCL6) and an additional ~40 amino acid sequence

229 downstream of CCL6 named Golgi-localizing essential domain (GLED] (CC1-GLED;  
230 Fig. 4A, Appendix Fig. S2). We then examined the effects of point mutations in the  
231 coiled-coil motifs of the N fragment. At first, four leucine residues appearing in every  
232 seven amino acids in the first half of CC1 were mutated to proline (4LP) to disrupt the  
233  $\alpha$ -helix itself, or alanine (4LA) to preserve the  $\alpha$ -helical structure but suppress its  
234 hydrophobic interactions (Fig. 4C). Importantly, not only 4LP mutation but also 4LA  
235 mutation was found to be sufficient to disrupt the Golgi localization of the N fragment  
236 (Fig. 4D). These results indicate that the coiled-coil interaction through the first half of  
237 CC1 was crucial for the Golgi association of the N fragment. We confirmed that 4LA  
238 mutations did not disrupt the co-assembling activity of the N fragment (Appendix Fig.  
239 S3), likely owing to the homo-interaction of the remaining coiled-coil motifs. This  
240 finding indicates that a partial disturbance of the oligomerization state of the N fragment  
241 was sufficient to disrupt the Golgi association.

242 Next, we examined whether these mutations affected the subcellular localization of  
243 full-length MTCL2. In these experiments, the expression of exogenous MTCL2 was  
244 induced at the endogenous levels in MTCL2-knockdown cells to exclude the effect of  
245 endogenous MTCL2 (Materials and Methods). In contrast to wild-type MTCL2, which  
246 showed preferential localization to the perinuclear MTs, similar to endogenous MTCL2,  
247 the 4LA mutant was diffusely distributed in the cytoplasm without any condensation  
248 around the Golgi (Fig. 4E). Importantly, careful examination revealed its colocalization  
249 with MTs (Fig. 4F, Fig. EV3A), suggesting that MTCL2 can interact with MTs  
250 independent of its Golgi association. These findings indicate that the characteristic  
251 perinuclear accumulation of endogenous MTCL2 was the result of its Golgi association  
252 through the N-terminal coiled-coil region.

253

254 **MTCL2 promotes the accumulation of MTs around the Golgi complex by**  
255 **crosslinking MTs on the Golgi membrane**

256

257 We analyzed the effects of MTCL2 knockdown in HeLa-K cells to explore the  
258 physiological function of MTCL2. For this purpose, we first established heterogeneous  
259 stable cells expressing mMTCL2 in a doxycycline-dependent manner (Materials and  
260 Methods). When cells were transfected with control siRNA in the absence of  
261 doxycycline (without exogenous MTCL2 expression), normal accumulation of MTs  
262 around the perinuclear region at which endogenous MTCL2 was concentrated was  
263 observed (Fig. 5A). Alternatively, when cells were subjected to MTCL2 knockdown in  
264 the absence of doxycycline (without exogenous MTCL2 expression), MT accumulation  
265 around the perinuclear region was severely reduced (Fig. 5A). The specificity of these  
266 knockdown effects was confirmed by a rescue experiment in which doxycycline was  
267 added to induce the expression of RNAi-resistant MTCL2 (mMTCL2) at endogenous  
268 levels. Under these conditions, many cells restored MT accumulation in the perinuclear  
269 region, where exogenous MTCL2 was concentrated. We quantitatively estimated the  
270 asymmetric distribution of MTs by calculating the skewness of the intensity distribution  
271 of tubulin signals within each cell (Fig. 5B, Appendix Fig. S4). In the control cells, the  
272 pixel intensity of tubulin signals was distributed with a skewness of 1.02 (median),  
273 whereas in MTCL2-knockdown cells, this value decreased to 0.73, indicating a more  
274 symmetric distribution of MTs. The expression of RNAi-resistant mMTCL2 restored  
275 this value to 1.17, statistically supporting its rescue activity.

276 Interestingly, MTCL2 knockdown also affected the assembly structure of the Golgi

277 stacks (Fig. EV4A). In contrast to control cells, which showed a compact crescent-like  
278 morphology of the Golgi ribbon on one side of the nucleus, MTCL2-knockdown cells  
279 exhibited abnormally expanded Golgi ribbons along the nucleus (Fig. EV4A). The  
280 median expansion angle ( $\theta$ ) of the Golgi apparatus (Fig. EV4A) was  $65.4^\circ$  for the  
281 control cells, whereas it significantly increased to  $82.5^\circ$  in MTCL2-knockdown cells  
282 (Fig. EV4B, Appendix Fig. S4). The expression of RNAi-resistant MTCL2 reduced the  
283 angle with a median value of  $61.0^\circ$ , indicating that MTCL2 was essential for compact  
284 accumulation of the Golgi ribbon. Similar effects of MTCL2 knockdown were observed  
285 in RPE1 cells (Appendix Fig. S5). These results demonstrate that MTCL2 plays an  
286 important role in promoting the perinuclear accumulation of MTs and increasing the  
287 compactness of Golgi ribbons.

288       Considering the MTCL2 activities shown in Figs. 2 and 3, these results are highly  
289 consistent with the hypothesis that MTCL2 crosslinks MTs on the Golgi membrane,  
290 thereby accumulating MTs around the Golgi ribbon. The effects on the compactness of  
291 the Golgi ribbon can also be explained as a secondary effect of MT accumulation, which  
292 must attract individual Golgi stacks to each other (Fig. EV4C). To test this hypothesis,  
293 we performed the same experiments using stable cells expressing the 4LA mutant in a  
294 doxycycline-dependent manner (Fig. 5C and D, Fig. EV4D and E, Appendix Fig. S4).  
295 Knockdown effects on MT organization and Golgi ribbon compactness were similarly  
296 observed in these stable cells (-dox). However, the expression of the 4LA mutant (+dox)  
297 did not restore both phenotypes. These findings indicate the importance of Golgi  
298 association in MTCL2 functioning. Through similar experiments, we further confirmed  
299 that MTCL2 lacking the MT-binding region (MTCL2  $\Delta$ KR) also showed loss of rescue  
300 activities against both phenotypes (Fig. EV5, Appendix Fig. S4).

301 Altogether, we conclude that MTCL2 promotes MT accumulation around the Golgi  
302 ribbon by exerting its MT crosslinking activity on the Golgi membrane.

303

### 304 **MTCL2 depletion resulted in defects in cell migration**

305

306 The Golgi ribbon structure and its associated MTs are essential for maintaining  
307 directed cell migration owing to their essential roles in the polarized transport of  
308 vesicles (Bergmann *et al*, 1983; Yadav *et al*, 2009b; Miller *et al*, 2009; Sato *et al*, 2014;  
309 Hurtado *et al*, 2011). Therefore, we next examined whether MTCL2 depletion affected  
310 directed cell migration during the wound healing process *in vitro*.

311 First, HeLa-K cells transfected with control or MTCL2 siRNA were grown to a  
312 confluent monolayer and scratched with a micropipette tip to initiate directional  
313 migration into the wound. In control cells at the wound edge, reorientation of the Golgi  
314 and elongation of a densely aligned MT toward the wound were observed (Fig. 6A). In  
315 MTCL2-knockdown cells, reorientation of the Golgi was reduced but not severely  
316 affected. Nevertheless, cells lacking MTCL2 exhibited randomly oriented MTs and  
317 failed to align them toward the wound (Fig. 6A).

318 Despite the significant difference in MT organization in cells at the wound edge, we  
319 could not estimate the effects of MTCL2 knockdown on directional migration as the  
320 HeLa-K cells migrated very slowly. Thus, we used RPE1 cells to estimate wound  
321 healing velocity and found that cells lacking MTCL2 migrated significantly slower than  
322 control cells (Fig. 6B, Movies EV1 and 2). Comparison of the normalized areas newly  
323 covered by migrated cells revealed that the directed migration velocity of MTCL2-  
324 knockdown cells was approximately 50% of that of control cells (Fig. 6B, right panel).

325 Time-lapse analysis of differential interference contrast images indicated that cells  
326 lacking MTCL2 exhibited abnormally elongated shapes and were less efficient in  
327 extending lamellipodia (Movie EV2). Reorientation of the Golgi position toward the  
328 wound was observed in MTCL2-knockdown cells to a similar extent as in control cells  
329 (Fig. 6C, D). In addition, in contrast to HeLa-K cells, MTCL2-knockdown cells showed  
330 polarized elongation of MTs toward the wound (Fig. 6C). However, the proximal ends  
331 of these MTs seemed unfocused. Close inspection revealed that in MTCL2-knockdown  
332 cells at the wound edge, the Golgi ribbon was frequently separated from the centrosome  
333 and sometimes detached from the nucleus (Fig. 6C and E). As a result, the centrosomal  
334 MTs and Golgi-associated MTs elongated from different positions toward the wound  
335 and were discerned in many MTCL2-knockdown cells (arrows in Fig. 6C, right panel).  
336 By contrast, in control cells, the centrosome and Golgi ribbon were tightly linked near  
337 the nucleus, and the proximal ends of the centrosomal and Golgi-associated MTs were  
338 indistinguishable. These data suggest an intriguing possibility that MTCL2 may play an  
339 essential role in integrating centrosomal and Golgi-associated MTs by crosslinking them  
340 on the Golgi membrane.

341

#### 342 **CLASPs are required for the perinuclear localization of MTCL2**

343

344 The Golgi association of MTCL1 was shown to be mediated by CLASPs and  
345 AKAP450 (Sato *et al.*, 2014). Therefore, to identify proteins that mediate the Golgi  
346 association of MTCL2, we first examined the effect of knockdown of CLASP or  
347 AKAP450 on the subcellular localization of MTCL2. Simultaneous depletion of  
348 CLASP1 and 2 profoundly impaired the accumulation of MTCL2 in the perinuclear



349 region and induced an even cytosolic distribution (Fig. 7A, Appendix Fig. S6).  
350 AKAP450 depletion also affected the distribution of MTCL2; however, it did not induce  
351 dissociation of MTCL2 from the perinuclear region where the Golgi apparatus localizes  
352 (Fig. 7A, Appendix Fig. S6). These results are consistent with the report that SOGA1  
353 interacts with CLASP2 (Kruse *et al*, 2017) and suggest the possibility that CLASPs play  
354 major roles in mediating the Golgi association of MTCL2. Consistently, GFP-  
355 CLASP2 $\alpha$  specifically interacted with N but not the M or C fragment of MTCL2 when  
356 co-expressed in HEK293T cells and subjected to pull-down experiments (Fig. 7B). The  
357 interaction was also observed for the minimum fragment of MTCL2 (CC1-GLED)  
358 required for Golgi association (Fig. 7B). However, we unexpectedly observed  
359 substantial interactions between GFP-CLASP2 $\alpha$  and CC1-GLED with 4LA mutations  
360 within CC1. In addition, depletion of AKAP450 and CLASPs did not affect the Golgi  
361 localization of the N fragment exogenously introduced in HeLa-K cells (Fig. 7C). These  
362 results raised the possibility that unknown factors other than CLASPs were involved in  
363 the CC1-dependent interaction of MTCL2 with the Golgi membrane. To identify these  
364 putative factors, we screened Golgi marker proteins exhibiting the most precise  
365 colocalization with the N fragment of MTCL2 (Appendix Fig. S7A). Close inspection  
366 using super-resolution microscopy revealed that the N fragment showed distinct  
367 localization from cis- and trans-Golgi markers; however, it exhibited the most  
368 significant colocalization with a cis/medial marker, giantin/GOLGB1 (Appendix Fig.  
369 S7A) (Linstedt *et al*, 1995). This finding led us to find that the Golgi localization of the  
370 N fragment almost disappeared in cells lacking giantin (Fig. 7C). Since expression of  
371 the N fragment was not reduced in giantin-knockdown cells (Appendix Fig. S7B and  
372 C), these results indicated that giantin is required for the Golgi association of the

373 MTCL2 N-terminus. Giantin knockdown partially impaired the perinuclear  
374 accumulation of endogenous MTCL2 (Fig. 7A, Appendix Fig. S6). Collectively, the  
375 findings indicate the possibility that giantin is primarily responsible for the recruitment  
376 of MTCL2 to the Golgi membrane in a CC1-dependent manner before CLASP  
377 involvement. As endogenous MTCL2 only shows restricted colocalization with  
378 CLASPs or giantin (Appendix Fig. S8), the interactions between MTCL2 and these  
379 proteins might be gradually weakened to realize its steady-state localization  
380 predominantly associated with the perinuclear MTs.

381

## Discussion

382

383 The results of this study demonstrate that the MTCL1 paralog MTCL2 is a novel  
384 MT-regulating protein that preferentially associates with perinuclear MTs around the  
385 Golgi. Its dual binding activity to MTs and the Golgi, as well as its oligomerizing  
386 activity via the coiled-coil region, collectively enabled it to crosslink and accumulate  
387 MTs on the Golgi membrane. Our data suggest that this unique activity of MTCL2 plays  
388 an important role in directed migration by integrating the centrosomal and Golgi-  
389 nucleated MTs on the Golgi membrane.

390 MTCL2 depletion severely disrupted the accumulation of MTs around the Golgi and  
391 induced random arrays of MTs (Fig. 5A). Low-dose re-expression of MTCL2 restored  
392 the original organization of MTs in a Golgi-binding activity-dependent manner. These  
393 data indicate that MTCL2 plays an indispensable role in the asymmetric organization of  
394 global MTs by utilizing the Golgi complex as a foothold for its MT-crosslinking  
395 function (Meiring *et al*, 2020). These findings also highlight the active role of the Golgi  
396 complex in MT organization in interphase cells. Regarding the molecular mechanisms  
397 underlying the Golgi association of MTCL2, we provide data indicating the possible  
398 involvement of CLASPs and giantin. CLASPs have been shown to play essential roles  
399 in development of Golgi-associated MTs through its +Tips activity (Miller *et al*, 2009;  
400 Efimov *et al*, 2007). Our results indicate that MT regulation by CLASPs is also  
401 mediated by its novel activity to facilitate the perinuclear condensation of MTCL2  
402 (Appendix Fig. S6B). The present data also reveal the presence of complicated  
403 mechanisms in the Golgi association of MTCL2, because CLASP2 interacted with the  
404 Golgi association region of MTCL2 independent of the 4LA mutation, and was not

405 necessarily required for its recruitment to the Golgi membrane. These complexities are  
406 consistent with the requirement of a long amino acid sequence containing multiple  
407 coiled-coil motifs and an additional unstructured region (GLED) (Appendix Fig. S2B)  
408 for the Golgi association, suggesting the presence of multiple and sequential  
409 interactions between the MTCL2 N-terminus and several Golgi-resident proteins. Here,  
410 we demonstrated that one of the candidate molecules of these Golgi-resident proteins is  
411 giantin, a large coiled-coil protein, the involvement of which has been demonstrated in  
412 ER-Golgi traffic as a tethering factor (Sönnichsen *et al*, 1998; Alvarez *et al*, 2001). The  
413 complexity of the Golgi-binding mechanisms is also indicated by comparison with  
414 MTCL1, which also exhibits a subcellular localization strikingly similar to that of  
415 MTCL2 (Fig. 2D) (Sato *et al*, 2014). As for this MTCL protein, we have failed to  
416 identify the Golgi association region, despite the significant amino acid similarity of its  
417 N-terminal coiled-coil motifs with MTCL2 (Fig. EV1). This difference between these  
418 paralogs is not merely due to the fact that the GLED sequence of MTCL2 is not  
419 conserved in MTCL1 (Fig. EV1B). The seamless exchange of the highly conserved  
420 CC1 sequence between MTCL1 and 2 was sufficient to disrupt the Golgi localization of  
421 the N fragment of MTCL2 (Appendix Fig. S2C). This finding indicates that the Golgi-  
422 binding mechanisms of MTCL proteins are not based on simple coiled-coil interactions  
423 but consist of sophisticated protein–protein interactions that are highly differential  
424 between these paralogues. Actually, we found here that the Golgi association of MTCL2  
425 strongly depends on CLASPs but not AKAP450 (Fig. 7A), whereas the Golgi  
426 association of MTCL1 depends on both proteins almost evenly (Sato *et al*, 2014). In this  
427 context, it is also noteworthy that full-length MTCL2 lacking MT-binding activity  
428 (MTCL2  $\Delta$ KR) was distributed diffusely without Golgi localization (Fig. 3A, Fig.

429 EV3A). This finding contrasted sharply with the clear association of the N fragment  
430 with the Golgi membrane (Fig. 3B). These results indicate a possibility that MT binding  
431 through the C-terminal region is a prerequisite for Golgi association via the N-terminal  
432 coiled-coil region and imply intramolecular regulation of the Golgi binding of MTCL2.  
433 The fact that endogenous MTCL2 does not exhibit complete colocalization with the  
434 Golgi complex further suggests the presence of additional mechanisms that regulate the  
435 balance between the dual binding activities of MTCL2 to MTs and the Golgi membrane.

436 Our results indicate that MTCL2 is expressed in several cultured cells  
437 simultaneously with MTCL1 (Fig. 1C) (Sato *et al*, 2014). Tissue distribution patterns of  
438 MTCL2 were also found to be similar to that of MTCL1 (Fig. 1D) (Satake *et al*, 2017).  
439 These results raise questions regarding how cells utilize these MTCL proteins. A clue  
440 can be drawn from the previously reported result that, in contrast to MTCL2, MTCL1  
441 knockdown does not change the global organization of MTs significantly but only  
442 reduces a specific subpopulation of MTs specifically stained with an anti-acetylated  
443 tubulin antibody (Sato *et al*, 2014). This MT subpopulation corresponds to stable MTs  
444 that are nucleated from the Golgi membrane with the aid of CLASPs and AKAP450  
445 (Chabin-Brion *et al*, 2001; Rivero *et al*, 2009; Efimov *et al*, 2007). We have  
446 demonstrated that MTCL1 stabilizes and crosslinks this specific MT subpopulation via  
447 C-MTBD and N-MTBD, respectively (Sato *et al*, 2014; Abdul Kader *et al*, 2017).  
448 Collectively, these results suggest that the target of MTCL1 action is restricted to the  
449 Golgi-associated MTs. Alternatively, we observed here that MTCL2 knockdown  
450 dramatically changed the global organization of MTs (Fig. 5A), and that the MT-  
451 binding region of MTCL2 lacks strong activity to stabilize MTs (Fig. EV3). These  
452 results suggest the possibility that, in contrast to MTCL1, the target of MTCL2 action

453 may not be restricted to the Golgi-nucleated MTs. In extreme cases, MTCL2 may  
454 crosslink any kinds of MTs running nearby the Golgi complex. This idea appears to be  
455 consistent with the present observation that MTCL2 is required to integrate centrosomal  
456 and Golgi-derived MTs on the Golgi membrane. Distinct involvement of AKAP450 in  
457 Golgi recruitment might be one of the bases of these functional differences between  
458 MTCL1 and 2. Further assessment of the Golgi recruiting mechanisms of each protein  
459 will better elucidate this issue.

460 In this study, we established the presence of a new family of MT-regulating  
461 proteins, the MTCL family. Since the members of this family are only found in  
462 vertebrates, their functions are expected to be tightly linked with vertebrate-specific  
463 cellular structures and functions. We propose to call this gene product MTCL2 instead  
464 of SOGA1 because our results demonstrate that it is a functional homolog of MTCL1 in  
465 the full-length form and does not function as SOGA1 in a cleaved form ubiquitously.  
466 This claim is also based on the fact that we failed to confirm the presence of a putative  
467 internal signal sequence as well as Atg16- and Rab5-binding motifs in the MTCL2  
468 sequence, all of which have been discussed previously (Cowherd *et al*, 2010).

469

470

471

## Materials and Methods

472

### 473 **Vector production**

474 The cDNA clone encoding full-length mMTCL2 (GenBank accession number:  
475 AK147227) was purchased from Danaform (Kanagawa, Japan). After confirming  
476 sequence identity with NM\_001164663, a DNA fragment corresponding to the MTCL2  
477 open reading frame was subcloned into an expression vector, pCAGGS-V5.  
478 Subsequently, several deletion mutants of MTCL2 were constructed in pCAGGS-V5,  
479 pEGFP-c2 (Takara Bio Inc., Japan), or pMal-c5x (New England Biolabs). To establish  
480 heterogeneous stable transformants, mMTCL2 and its mutants with or without a 6 × V5-  
481 tag were subcloned in pOSTet15.1 (kindly provided by Y. Miwa, University of Tsukuba,  
482 Japan), an Epstein–Barr virus-based extrachromosomal vector carrying a replication  
483 origin and replication initiation factor sufficient for autonomous replication in human  
484 cells (Tanaka *et al*, 1999). Mouse MTCL1 cDNA (GenBank accession number:  
485 AK147691) was used as described previously (Sato *et al*, 2013). Expression vector for  
486 GFP-CLASP2 $\alpha$  was a gift from I, Hayashi (Yokohama City University, Japan).

487

### 488 **Antibodies**

489 To detect MTCL1 and MTCL2, anti-KIAA0802 (sc-84865) from Santa Cruz  
490 Biotechnology and anti-SOGA1 (HPA043992) from Sigma-Aldrich were used,  
491 respectively. To detect other proteins, the following antibodies were used: anti- $\alpha$ -tubulin  
492 (sc-32293), anti-acetylated tubulin (sc-23950), anti-MAP4 (sc-67152), anti-GFP (sc-  
493 9996) and anti-CLASP2 (sc-376496) from Santa Cruz Biotechnology; anti-V5 (R960-  
494 25) from Thermo Fisher Scientific; anti-GM130 (610822) and anti-GS28 (611184) from

495 BD Transduction Laboratories; anti-GAPDH (5G4) from HyTest Ltd.; anti-giantin  
496 (ab37266) and anti-pericentrin (ab4448) from Abcam; anti-GCC185 from Bethyl  
497 Laboratories; anti-Flag (F3165) from Sigma-Aldrich; anti- $\beta$ -tubulin (MAB3408) from  
498 Merk Millipore; anti-CLASP1 (MAB9736) from Abnova; anti-AKAP450 from Novus  
499 Biologicals; anti-Golgin97 (D8P2K) from Cell Signaling Technology.

500

### 501 **Cell culture and plasmid transfection**

502 HeLa-Kyoto (HeLa-K), HEK293T, and HepG2 cells were cultured in Dulbecco's  
503 modified Eagle's medium (DMEM, low glucose; Nissui, Japan) containing 10% fetal  
504 bovine serum, 100 U/mL penicillin, 100  $\mu$ g/mL streptomycin, and 1 mM glutamine at  
505 37°C in 5% CO<sub>2</sub>. The hTERT-immortalized human retinal pigment epithelial cells  
506 (RPE1 cells) were maintained in a 1:1 mixture of DMEM/Ham's F12 (FUJIFILM Wako  
507 Pure Chemical Corporation, Japan) containing 10% fetal bovine serum, 100 U/mL  
508 penicillin, 100  $\mu$ g/mL streptomycin, 10  $\mu$ g/mL hygromycin B, and 1 mM glutamine at  
509 37°C in 5% CO<sub>2</sub>. For immunofluorescence analysis, cells were seeded on coverslips in  
510 24-well plates and coated with atelocollagen (0.5 mg/mL IPC-50; KOKEN, Japan).  
511 Plasmid transfections were performed using polyethyleneimine (Polysciences, Inc.) for  
512 HEK293T cells or Lipofectamine LTX (Life Technologies Corporation) for HeLa-K  
513 cells according to the manufacturer's instructions. To establish heterogenous stable  
514 HeLa-K cells expressing mMTCL2 or its mutants in a doxycycline-dependent manner,  
515 cells were transfected with pOSTet15.1 expression vector encoding the appropriate  
516 MTCL2 cDNA. The following day, cells were reseeded at one-twentieth of the cell  
517 density and subjected to selection using a medium containing 800  $\mu$ g/mL G418 disulfate  
518 (Nacalai Tesque, Japan) for more than six days. Surviving cells were used in subsequent



519 experiments without cloning.

520

521 **RNAi experiments and wound healing assays**

522 siRNAs for human MTCL2 were designed to target the following sequences: MTCL#2,

523 GAGCGACCGAGAGAGCATTCC; #5, CTGAAGTACCGCTCGCTCT. The target

524 sites for CLASP1, CLASP2, and AKAP450 have been described previously. CLASP1,

525 GGATGATTTACAAGACTGG; CLASP2, GACATACATGGGTCTTAGA (Mimori-

526 Kiyosue et al, 2005); AKAP450, AACTTTGAAGTTAACTATCAA (Rivero *et al*,

527 2009). A non-silencing RNAi oligonucleotide (Allstars negative control siRNA) was

528 purchased from Qiagen. Cells were seeded on coverslips at densities of  $1.2\text{--}4 \times 10^4$

529 cells and transfected with siRNAs at final concentrations of 10–17 nM using RNAiMax

530 (Life Technologies Corporation) according to the manufacturer's instructions. siRNA

531 transfection was repeated the day after medium change, and cells were subjected to

532 immunofluorescence analysis on day 3. For rescue experiments, heterogeneous stable

533 HeLa-K cells expressing mMTCL2 were subjected to a similar protocol, except that 100

534 ng/mL of doxycycline was always included in the medium after the first siRNA

535 transfection. For wound healing analysis, HeLa-K cells subjected to RNAi were

536 scratched with a micropipette tip on day 4. RPE1 cells were seeded at  $5 \times 10^4$  cells in

537 one compartment of a 35 mm glass bottom culture dish separated into four

538 compartments (Greiner, 627870) after coating with 10  $\mu\text{g}/\text{mL}$  fibronectin (FUJIFILM,

539 Japan, 063-05591). The siRNA transfections were performed as described above.

540 Wounds were created on day 4 by scratching the cell monolayers with a micropipette tip

541 and subjected to live imaging.

542

543 **Cell extraction and western blotting**

544 Cell extracts were prepared by adding RIPA buffer (25 mM Tris/HCl [pH 7.5], 150 mM  
545 NaCl, 1% NP40, 1% deoxycholic acid, 0.1% SDS) containing a protease inhibitor  
546 cocktail (Sigma-Aldrich, P8340) followed by brief sonication and centrifugation  
547 ( $15,000 \times g$ , 15 min). For tissue distribution analysis of MTCL2, mouse tissue lysates  
548 prepared in a previous study were used (Satake *et al*, 2017). Samples were separated by  
549 SDS-PAGE and transferred to polyvinylidene fluoride membranes. Blots were  
550 incubated in blocking buffer containing 5% (w/v) dried skim milk in PBST (8.1 mM  
551  $\text{Na}_2\text{HPO}_4 \cdot 12\text{H}_2\text{O}$ , 1.47 mM  $\text{KH}_2\text{PO}_4$ , 137 mM NaCl, 2.7 mM KCl, and 0.05% Tween  
552 20), followed by overnight incubation with the appropriate antibodies diluted in  
553 blocking buffer. Dilutions of anti-SOGA1 and anti-GAPDH antibodies were 1:1000 and  
554 1:5000, respectively. The secondary antibodies were diluted at 1:2,000. Blots were then  
555 exposed to horseradish peroxidase (HRP)-conjugated secondary antibodies (GE  
556 Healthcare) diluted in blocking buffer for 60 min at RT and washed again. Blots were  
557 visualized using Immobilon Western Chemiluminescent HRP Substrate (Millipore) or  
558 ECL western blotting detection system (GE Healthcare). Chemiluminescence was  
559 quantified using the ImageQuant LAS4000 Luminescent Image Analyzer (GE  
560 Healthcare).

561

562 **Immunofluorescence staining**

563 In most cases, cells were fixed with cold methanol for 10 min at  $-20^\circ\text{C}$ , followed by  
564 blocking with 10% (v/v) fetal bovine serum in PBST. To visualize subcellular  
565 localization of exogenous MTCL2, cells were treated with modified PBST containing  
566 0.5% TritonX-100 instead of Tween 20 for 10 min after methanol fixation. To examine

567 different fixation conditions, cells were fixed with 4% paraformaldehyde in BRB80  
568 buffer (80 mM PIPES-KOH [pH 6.8], 1 mM MgCl<sub>2</sub>, 1 mM EGTA), with or without  
569 pre-extraction using BRB80 buffer supplemented with 4 mM EGTA and 0.5% TX-100,  
570 for 30 s at 37 °C. After fixation and blocking, samples were incubated with appropriate  
571 primary antibodies diluted in TBST (10 mM Tris-HCl [pH 7.5], 150 mM NaCl, 0.01%  
572 [v/v] Tween 20) containing 0.1% (w/v) BSA for 45 min at RT, except for MTCL1,  
573 MTCL2, and MAP4 staining, which was performed overnight at 4 °C. After washing  
574 with PBST, samples were visualized with the appropriate secondary antibodies  
575 conjugated with Alexa Fluor 488, 555, or 647 (Life Technologies Corporation) by  
576 incubating for 45 min at RT. Antibodies were diluted as follows: anti-KIAA0802  
577 (1/1000), anti-SOGA1 (1/2000), anti- $\alpha$ -tubulin (1:1000), anti- $\beta$ -tubulin (1:2000), anti-  
578 acetylated tubulin (1:1000), anti-V5 (1:4000), anti-GM130 (1:1000), anti-GS28 (1:300),  
579 anti-GFP (1:2,000), anti-MAP4 (1:1000), anti-pericentrin (1:1000), anti-CLASP1  
580 (1:500), anti-CLASP2 (1:500), anti-giantin (1:1000), anti-GCC185 (1:2000; anti-  
581 AKAP450 (1:500); anti-Golgin97 (1:1000). All secondary antibodies were used at a  
582 1:2000 dilution. The nuclei were counterstained with 4', 6-diamidino-2-phenylindole  
583 (MBL, Japan) at a 1:2000 dilution in PBST during the final wash. For image  
584 acquisition, samples on coverslips were mounted onto glass slides in Prolong Diamond  
585 Antifade Mountant (Thermo Fisher Scientific).

586

### 587 **Image acquisition and processing**

588 High-resolution images were acquired using a Leica SP8 laser scanning confocal  
589 microscopy system equipped with an HC PL APO 63x/1.40 Oil 2 objective, using the  
590 Hybrid Detector in photon-counting mode. To obtain super-resolution images,

591 HyVolution2 imaging was performed on the same system using the Huygens Essential  
592 software (Scientific Volume Imaging) (Borlinghaus & Kappel, 2016). To obtain wide-  
593 view images for quantification (Fig. 5, Figs. EV4 and 5), conventional fluorescence  
594 images were obtained using an AxioImager ZI microscope (Carl Zeiss, Oberkochen,  
595 Germany) equipped with a Plan APCHROMAT 40×/0.95 objective using an Orca II  
596 CCD camera (Hamamatsu Photonics, Shizuoka, Japan). The laterally expanding angle  
597 of the Golgi apparatus around the nuclei and the skewness of pixel intensity were  
598 quantified using the “Measure” function of ImageJ software. For statistical analysis,  
599 photographs of several fields containing ~40 cells with similar densities were taken. All  
600 cells in each field were subjected to the following quantification analysis to avoid  
601 selection bias. In rescue experiments, ~100 cells expressing exogenous MTCL2 at  
602 similar expression levels as the endogenous one were collected from ~10 fields with  
603 similar cell densities. For live-cell imaging, differential interference contrast images  
604 were acquired using a Leica SP8 confocal microscopy system equipped with an HCX  
605 PL APO 10×/0.40 objective using a 488 nm laser line. Areas newly covered by  
606 migrated cells during wound healing for 440 min were estimated using the “Measure”  
607 function of ImageJ software and normalized by the length of the corresponding wound  
608 edge at time 0.

609

#### 610 **MT-binding assay**

611

612 MBP or MBP-mMTCL1 CT1 was purified from the soluble fraction of *E. coli*  
613 according to the standard protocol and dialyzed against BRB80 buffer. Each MBP was  
614 incubated with taxol-stabilized MTs (final concentrations of both the sample protein and

615  $\alpha/\beta$ -tubulin heterodimer were 0.5 mg/mL) in BRB80 supplemented with 1.5 mM MgCl<sub>2</sub>  
616 and 1 mM GTP for 15 min at RT and subjected to centrifugation (200,000 × *g*) for 20  
617 min at 25°C on a cushion of 40% glycerol in BRB buffer. Following careful removal of  
618 the supernatant and glycerol cushion, the resultant MT pellet was gently washed with  
619 PBST three times and solubilized with SDS sample buffer (10%  $\beta$ -mercaptoethanol,  
620 125 mM Tris-HCl [pH 6.8], 2% SDS, 10% glycerol, and 0.005% bromophenol blue) for  
621 subsequent SDS-PAGE analysis.

622

### 623 **Pull-down experiments**

624 HEK293T cells (~8 × 10<sup>6</sup> cells) transfected with appropriate expression vectors were  
625 solubilized in 500  $\mu$ L lysis buffer (20 mM Tris-HCl [pH 7.5], 150 mM NaCl, 0.3% TX-  
626 100, 2 mM MgCl<sub>2</sub>, 1 mM EGTA) containing a cocktail of protease and phosphatase  
627 inhibitors (Roche Applied Science) for 30 min at 4°C. They were then briefly sonicated  
628 and centrifuged at 15,000 × *g* for 30 min. The resulting supernatants were mixed with  
629 streptavidin-conjugated magnetic beads (Cytiva) for ~2 h at 4°C. The beads were  
630 collected using a magnet, washed with lysis buffer three times, and then boiled in SDS  
631 sample buffer. Proteins released from the beads were subjected to western blotting  
632 analysis using the following antibodies: anti-V5 (1:3000), anti-GFP (1:1000), and anti-  
633 Flag (1:3000).

634

635

### **Acknowledgments**

636

637 The authors thank Yoshihiro Miwa (University of Tsukuba) and Ikuko Hayashi  
638 (Yokohama City University) for providing the pOSTet15.1 expression vector and GFP-  
639 CLASP2 $\alpha$  expression vector, respectively. This work was supported by KAKENHI (to  
640 A.S.) (Grant Numbers 16H04765 and 19H03228) of the Ministry of Education, Culture,  
641 Sports, Science, and Technology (MEXT) of Japan.

642

643

644

645

### **Author contributions**

646

647 A.S. planned and performed the experiments, interpreted the results, and wrote the  
648 manuscript. R.M., M. M., S. M., C. Y., and Y.I. performed the experiments.

649

650

651

### **Conflict of interest**

652

653 The authors declare no competing financial interests.

654

655

## References

- 656  
657
- 658 Abdul Kader M, Satake T, Yoshida M, Hayashi I & Suzuki A (2017) Molecular basis of  
659 the microtubule-regulating activity of microtubule crosslinking factor 1. *PLoS One*  
660 12: e0182641
- 661 Alvarez C, Garcia-Mata R, Hauri HP & Sztul E (2001) The p115-interactive Proteins  
662 GM130 and Giantin Participate in Endoplasmic Reticulum-Golgi Traffic. *J Biol*  
663 *Chem* 276: 2693–2700
- 664 Bartolini F & Gundersen GG (2006) Generation of noncentrosomal microtubule arrays.  
665 *J Cell Sci* 119: 4155–63
- 666 Bergmann JE, Kupfer A & Singer SJ (1983) Membrane insertion at the leading edge of  
667 motile fibroblasts. *Proc Natl Acad Sci U S A* 80: 1367–1371
- 668 Borlinghaus RT & Kappel C (2016) HyVolution—the smart path to confocal super-  
669 resolution. *Nat Methods* 13: i–iii
- 670 Chabin-Brion K, Marceiller J, Perez F, Settegrana C, Drechou A, Durand G & Poüs C  
671 (2001) The Golgi complex is a microtubule-organizing organelle. *Mol Biol Cell*  
672 12: 2047–60
- 673 Chapin SJ & Bulinski JC (1991) Non-neuronal 210 x 10(3) Mr microtubule-associated  
674 protein (MAP4) contains a domain homologous to the microtubule-binding  
675 domains of neuronal MAP2 and tau. *J Cell Sci* 98 ( Pt 1): 27–36
- 676 Combs TP & Marlist EB (2014) Adiponectin signaling in the liver. *Rev Endocr Metab*  
677 *Disord* 15: 137–147
- 678 Conduit PT, Wainman A & Raff JW (2015) Centrosome function and assembly in  
679 animal cells. *Nat Rev Mol Cell Biol* 16: 611–624

- 680 Cowherd RB, Asmar MM, Alderman JM, Alderman E a, Garland AL, Busby WH,  
681 Bodnar WM, Rusyn I, Medoff BD, Tisch R, *et al* (2010) Adiponectin lowers  
682 glucose production by increasing SOGA. *Am J Pathol* 177: 1936–1945
- 683 Efimov A, Kharitonov A, Efimova N, Loncarek J, Miller PM, Andreyeva N, Gleeson P,  
684 Galjart N, Maia ARR, McLeod IX, *et al* (2007) Asymmetric CLASP-Dependent  
685 Nucleation of Noncentrosomal Microtubules at the trans-Golgi Network. *Dev Cell*  
686 12: 917–930
- 687 Hurtado L, Caballero C, Gavilan MP, Cardenas J, Bornens M & Rios RM (2011)  
688 Disconnecting the Golgi ribbon from the centrosome prevents directional cell  
689 migration and ciliogenesis. *J Cell Biol* 193: 917–33
- 690 Kruse R, Krantz J, Barker N, Coletta RL, Rafikov R, Luo M, Højlund K, Mandarino LJ  
691 & Lenglais PR (2017) Characterization of the CLASP2 protein interaction network  
692 identifies SOGA1 as a microtubule-associated protein. *Mol Cell Proteomics* 16:  
693 1718–1735
- 694 Linstedt AD, Foguet M, Renz M, Seelig HP, Glick BS & Hauri HP (1995) A C-  
695 terminally-anchored Golgi protein is inserted into the endoplasmic reticulum and  
696 then transported to the Golgi apparatus. *Proc Natl Acad Sci U S A* 92: 5102–5105
- 697 Meiring JCM, Shneyer BI & Akhmanova A (2020) Generation and regulation of  
698 microtubule network asymmetry to drive cell polarity. *Curr Opin Cell Biol* 62: 86–  
699 95
- 700 Miller PM, Folkmann AW, Maia ARR, Efimova N, Efimov A & Kaverina I (2009)  
701 Golgi-derived CLASP-dependent microtubules control Golgi organization and  
702 polarized trafficking in motile cells. *Nat Cell Biol* 11: 1069–80
- 703 Mimori-Kiyosue Y, Grigoriev I, Lansbergen G, Sasaki H, Matsui C, Severin F, Galjart



- 704 N, Grosveld F, Vorobjev I, Tsukita S, *et al* (2005) CLASP1 and CLASP2 bind to  
705 EB1 and regulate microtubule plus-end dynamics at the cell cortex. *J Cell Biol*  
706 168: 141–153
- 707 Nishita M, Satake T, Minami Y & Suzuki A (2017) Regulatory mechanisms and  
708 cellular functions of non-centrosomal microtubules. *J Biochem* 109: 20029–20034
- 709 Rivero S, Cardenas J, Bornens M & Rios RM (2009) Microtubule nucleation at the cis-  
710 side of the Golgi apparatus requires AKAP450 and GM130. *EMBO J* 28: 1016–  
711 1028
- 712 Sanders AAWM & Kaverina I (2015) Nucleation and Dynamics of Golgi-derived  
713 Microtubules. 9: 1–7
- 714 Satake T, Yamashita K, Hayashi K, Miyatake S, Tamura-Nakano M, Doi H, Furuta Y,  
715 Shioi G, Miura E, Takeo YH, *et al* (2017) MTCL1 plays an essential role in  
716 maintaining Purkinje neuron axon initial segment. *EMBO J* 36: 1227–1242
- 717 Sato Y, Akitsu M, Amano Y, Yamashita K, Ide M, Shimada K, Yamashita A, Hirano H,  
718 Arakawa N, Maki T, *et al* (2013) The novel PAR-1-binding protein MTCL1 has  
719 crucial roles in organizing microtubules in polarizing epithelial cells. *J Cell Sci*  
720 126: 4671–4683
- 721 Sato Y, Hayashi K, Amano Y, Takahashi M, Yonemura S, Hayashi I, Hirose H, Ohno S  
722 & Suzuki A (2014) MTCL1 crosslinks and stabilizes non-centrosomal  
723 microtubules on the Golgi membrane. *Nat Commun* 5: 5266
- 724 Sönnichsen B, Lowe M, Levine T, Jämsä E, Dirac-Svejstrup B & Warren G (1998) A  
725 role for giantin in docking COPI vesicles to Golgi membranes. *J Cell Biol* 140:  
726 1013–1021
- 727 Tanaka J, Miwa Y, Miyoshi K, Ueno A & Inoue H (1999) Construction of Epstein-Barr

728 virus-based expression vector containing mini-oriP. *Biochem Biophys Res*  
729 *Commun* 264: 938–43

730 Vorobjev IA & Nadezhdina ES (1987) The Centrosome and Its Role in the Organization  
731 of Microtubules. *Int Rev Cytol* 106: 227–293

732 Wei JH & Seemann J (2010) Unraveling the Golgi ribbon. *Traffic* 11: 1391–1400  
733 doi:10.1111/j.1600-0854.2010.01114.x [PREPRINT]

734 Wu J & Akhmanova A (2017) Microtubule-Organizing Centers. *Annu Rev Cell Dev*  
735 *Biol* 33: annurev-cellbio-100616-060615

736 Wu J, de Heus C, Liu Q, Bouchet BP, Noordstra I, Jiang K, Hua S, Martin M, Yang C,  
737 Grigoriev I, *et al* (2016) Molecular Pathway of Microtubule Organization at the  
738 Golgi Apparatus. *Dev Cell* 39: 44–60

739 Yadav S, Puri S & Linstedt AD (2009a) A primary role for Golgi positioning in directed  
740 secretion, cell polarity, and wound healing. *Mol Biol Cell* 20: 1728–36

741 Yadav S, Puri S & Linstedt AD (2009b) A primary role for golgi positioning in directed  
742 secretion, cell polarity, and wound healing. *Mol Biol Cell* 20: 1728–1736

743 Yang C, Wu J, de Heus C, Grigoriev I, Liv N, Yao Y, Smal I, Meijering E,  
744 Klumperman J, Qi RZ, *et al* (2017) EB1 and EB3 regulate microtubule minus end  
745 organization and Golgi morphology. *J Cell Biol* 216: 3179–3198

746

747

## Figure Legends

748

749

750 **Figure 1. MTCL2 is expressed predominantly as a 180 kDa full-length uncleaved**  
751 **protein.**

752 A. Predicted molecular structure of mouse MTCL2 (mMTCL2) and its amino acid  
753 sequence homology with mouse MTCL1 (mMTCL1). CC (dark blue) corresponds to  
754 the region with the highest score ( $>0.85$ ) of coiled-coil prediction, whereas CCL (light  
755 blue) corresponds to the region with a moderate score ( $>0.4$ ) ([https://embnet.vital-](https://embnet.vital-it.ch/software/COILS_form.html)  
756 [it.ch/software/COILS\\_form.html](https://embnet.vital-it.ch/software/COILS_form.html)). The black bar labeled “epitope” indicates the  
757 position of the antigen peptide of the anti-SOGA1 antibody used in this study. The red  
758 bar indicates the region named KR-rich region whose amino acid sequence shows  
759 significant homology with C-MTBD of MTCL1 (Fig. EV1C). The boxed illustrations at  
760 the bottom indicate the structure of mouse SOGA1 (mSOGA1) in comparison with full-  
761 length mMTCL2 and summarize the arguments presented in the study reporting SOGA1  
762 (Cowherd *et al*, 2010). The green bar indicates the predicted position of the internal  
763 signal sequence, whereas green dotted arrows indicate the predicted positions of  
764 cleavages.

765 B. Western blotting analysis of HEK293T extracts transfected with indicated expression  
766 vectors. Used antibodies are indicated on the left of each panel. Note that detection was  
767 performed at a low sensitivity, wherein endogenous MTCL2 could not be detected in  
768 HEK293T or HeLa-K cell extracts (see lane 1 or 4 in the right panel, respectively).

769 C. Western blotting analysis of endogenous MTCL2 in various cultured cells using an  
770 anti-SOGA1 antibody. In lane 1–3, cell extracts of HEK293T expressing exogenous V5-  
771 mMTCL2 were loaded after serial dilutions (1/10, 1/30, and 1/100). In other lanes,  
772 extracts of indicated culture cells with or without MTCL2 knockdown were loaded. NS:

773 non-silencing control; #2 and #5 indicate different siRNAs for MTCL2.

774 D. Tissue distribution of MTCL2. Total extracts from the indicated mouse tissues (25  
775  $\mu\text{g}/\text{lane}$ ) were loaded for western blotting analysis using an anti-SOGA1 antibody. In  
776 lane 1, total cell extracts of HEK293T expressing exogenously expressed V5-mMTCL2  
777 were loaded as a positive control.

778

779 **Figure 2. MTCL2 preferentially colocalizes with the perinuclear microtubules**  
780 **accumulated around the Golgi complex**

781 A. HeLa-K cells were stained with anti-SOGA1 (MTCL2) together with anti- $\alpha$ -tubulin  
782 and anti-GS28 antibodies. Scale bar: 20  $\mu\text{m}$ . Boxed regions in the top panels I and II are  
783 enlarged in middle or bottom panels, respectively. Scale bars: 5  $\mu\text{m}$ .

784 B. Colocalization of MTCL2 with MTs in the peripheral region shown in (A) was  
785 confirmed through line scan analysis.

786 C. Subcellular localization of exogenously expressed V5-tagged MTCL2 in HeLa-K  
787 cells was analyzed using anti-V5 and anti- $\alpha$ -tubulin antibodies. Scale bar: 20  $\mu\text{m}$ . The  
788 boxed region is enlarged in the right panels. Scale bar: 5  $\mu\text{m}$ .

789 D. HeLa-K cells were stained with anti-MTCL1, SOGA1 (MTCL2), or MAP4  
790 antibodies together with anti- $\alpha$ -tubulin antibody, as indicated. Scale bar: 20  $\mu\text{m}$ . Boxed  
791 regions are enlarged in bottom panels. Scale bar: 5  $\mu\text{m}$ .

792

793 **Figure 3. MTCL2 directly associates with MTs via the C-terminal KR-rich region.**

794 A. MTCL2 deletion mutants related to this figure. Red bars indicate the position of the  
795 KR-rich region.

796 B. Subcellular localization of V5-C (top), -M (middle), and -N (bottom) in HeLa-K

797 cells. The antibodies used are indicated at the top. Scale bar: 20  $\mu\text{m}$ . The boxed region  
798 of a V5-C-expressing cell is enlarged in the right panels. Scale bar: 5  $\mu\text{m}$ . Note that the  
799 C fragment is colocalized with MTs, whereas the N fragment is localized to the Golgi  
800 distinctly.

801 C. MBP-fused CT1 purified from *Escherichia coli* was examined for MT pull-down  
802 experiments. MBP-CT1 and not MBP was precipitated only when taxol-stabilized MTs  
803 were included. ppt represents the MT precipitate obtained after centrifugation (200,000  
804  $\times g$ ) for 20 min at 25°C.

805 D. Subcellular localization of GFP-KR-rich in HeLa-K cells. Scale bar: 20  $\mu\text{m}$ .

806 E. V5-N (left panels) or V5-M (right panels) were expressed in HEK293T cells together  
807 with the indicated proteins and subjected to pull-down assays using streptavidin-  
808 conjugated beads. In the mock sample, an empty backbone vector for Flag-SBP  
809 constructs was co-transfected.

810 F. Subcellular localization of V5-M+C in HeLa-K cells. Scale bar: 20  $\mu\text{m}$ .

811

812 **Figure 4. MTCL2 associates with the Golgi membrane via the N-terminal coiled-**  
813 **coil region.**

814 A. MTCL2 deletion mutants related to this figure and the summary of their Golgi  
815 association activity.

816 B. Subcellular localization of the indicated mutants in HeLa-K cells. Scale bar: 20  $\mu\text{m}$ .

817 C. Amino acid sequence of the first half of MTCL2 CC1 and positions of four leucine  
818 residues mutated in this study (red). The characteristic seven-residue repeats are  
819 indicated by horizontal arrows, and the positions of each amino acid in a repeat are  
820 indicated by italic alphabets (*a* to *g*).

821 D. Subcellular localization of the indicated N fragment mutants in HeLa-K cells was  
822 examined using anti-V5 antibody. Scale bar: 20  $\mu$ m.

823 E and F. Subcellular localization of V5-mMTCL2 wt or 4LA mutant in HeLa-K cells  
824 analyzed using anti-MTCL2 (SOGA1) antibody together with anti-GM130 (E) or anti-  
825  $\alpha$ -tubulin (F). Scale bar: 20  $\mu$ m. Boxed regions in (F) are enlarged in the right panels.  
826 Scale bar: 5  $\mu$ m. Note that the expression of each exogenous protein was induced in  
827 MTCL2-knockdown cells and suppressed to the endogenous level.

828

829 **Figure 5. MTCL2 promotes the perinuclear accumulation of MTs in a Golgi-**  
830 **association-dependent manner.**

831 A. HeLa-K cells stably harboring pOSTet15.1 expression vector for mouse MTCL2  
832 were transfected with siRNAs for control or MTCL2 knockdown (#2) in the presence or  
833 absence of 100 nM doxycycline (dox) and doubly stained with anti-SOGA1 (MTCL2)  
834 and anti- $\alpha$ -tubulin antibody, as indicated on the left. Scale bar: 20  $\mu$ m.

835 B. Extent of MT accumulation was quantitatively estimated by calculating the skewness  
836 of the pixel intensity distribution for tubulin signals in each cell. The top panel shows  
837 typical data on the tubulin signal distributions and their skewness values, indicating that  
838 the asymmetries of tubulin signal distribution are compromised in MTCL2-knockdown  
839 cells. The bottom is a box plot of the skewness distribution in each condition. The lines  
840 within each box represent medians. Data represent the results of the indicated number  
841 (n) of cells from a typical experiment (biological replicates; Materials and Methods).  
842 The *p* values were estimated using the Wilcoxon test. Statistical data of technical  
843 replicates (three independent experiments) are demonstrated in Appendix Fig. S4.

844 C. HeLa-K cells stably harboring pOSTet15.1 expression vector for mouse MTCL2

845 4LA were subjected to the same experimental procedure as in (A). Scale bar: 20  $\mu\text{m}$ .

846 D. MT accumulation data in (C) was quantitatively analyzed as in (B).

847

848 **Figure 6. MTCL2 depletion results in defective cell migration.**

849 A. Confluent monolayers of HeLa-K cells subjected to control or MTCL2 RNAi were  
850 fixed and stained with the indicated antibodies 6 h after wounding. Cells facing the  
851 wound edges (white dotted lines) are shown. Scale bar: 50  $\mu\text{m}$ . Note that MTCL2-  
852 depleted cells did not polarize MT arrays toward the wound. The right panel indicates  
853 the percentage of wound-edge cells with correctly oriented Golgi, defined as those  
854 falling in the indicated quadrant (white line) concerning the wound edge. Data represent  
855 the means  $\pm$  S.D. for the indicated number (n) of cells from two independent  
856 experiments. The *p* value was estimated using the Student's t-test assuming the two-  
857 tailed distribution and two-sample unequal variance.

858 B. Differential interference contrast images of wound healing RPE1 cells at 0 min and 7  
859 h 20 min after wounding. White dotted line delineates the wound edges. Scale bar: 200  
860  $\mu\text{m}$ . Right panel indicates quantified data on the areas newly buried by cells after  
861 wounding. Data represent the mean  $\pm$  S.D. of 44 fields taken from two independent  
862 experiments. The *p* value was estimated using Student's t-test assuming the two-tailed  
863 distribution and two-sample unequal variance.

864 C. RPE1 cells subjected to wound healing analysis in (B) were fixed and stained with  
865 the indicated antibodies. Cells facing the wound edges are shown. Right panels show  
866 the enlarged view. Arrowheads indicate the positions of the centrosomes. Note that  
867 MTCL2-depleted cells exhibit separation of the centrosome and Golgi. The centrosomes  
868 frequently show significant detachment from the perinuclear region (see yellow

869 arrowhead). White and yellow arrows indicate MTs emanating from the centrosome and  
870 the Golgi, respectively. Scale bars: 50  $\mu\text{m}$  and 20  $\mu\text{m}$  (enlarged right panels).

871 D. Golgi orientation was quantified for wound healing RPE1 cells, as indicated in (A).  
872 Data represent the means  $\pm$  S.D. for the indicated number (n) of cells from two  
873 independent experiments. The *p* value was estimated using the Student's t-test assuming  
874 the two-tailed distribution and two-sample unequal variance.

875 E. Percentage of wound-edge cells with Golgi detached from the centrosome. Data  
876 represent the means  $\pm$  S.D. for the indicated number (n) of cells from two independent  
877 experiments. The *p* value was estimated using the Student's t-test assuming the two-  
878 tailed distribution and two-sample unequal variance.

879

880 **Figure 7. CLASPs and giantin are involved in the Golgi association of MTCL2.**

881 A. HeLa-K cells subjected to the indicated knockdown were stained with anti-SOGA1  
882 (MTCL2) and anti-GM130 antibodies. Scale bar: 20  $\mu\text{m}$ .

883 B. GFP-CLASP2 $\alpha$  was expressed in HEK293T cells together with the indicated Flag-  
884 SBP-tagged proteins and subjected to pull-down assays using streptavidin-conjugated  
885 beads.

886 C. V5-N was expressed in HeLa-K cells subjected to the indicated knockdown and  
887 examined for the Golgi association. Scale bar: 20  $\mu\text{m}$ .

888



889

### Expanded View Figure Legends

890

#### 891 **Figure EV1. Sequence alignment of amino acid sequences of mouse MTCL1 and 2.**

892 A. The N-terminal sequences. Boxed region corresponds to N-MTBD of MTCL1.

893 Asterisks indicate the positions of proline highly condensed in this region.

894 B. The N-terminal coiled-coil region. The positions of each coiled-coil motif (CC) or

895 coiled-coil-like motif (CCL) of MTCL1 or 2 are indicated by bold lines on the top or

896 bottom of each sequence, respectively. GLED sequence of MTCL2 is underlined by a

897 red dashed line. Four leucine residues mutated in 4LA or 4LP mutants are indicated red

898 arrowheads. A tyrosine residue that disrupts the periodicity of CC1 is boxed. Blue

899 dotted lines indicate the region corresponding to the epitope for anti-SOGA1 antibody

900 C. The sequences of the C-terminal MT-binding regions. Because MTCL1 C-MTBD

901 (boxed) was defined for human protein (Sato *et al*, 2013), the human sequence of

902 MTCL1 is also included in this alignment. The region of mouse MTCL2 corresponding

903 to MTCL1 C-MTBD is designated the “KR-rich region” since the conserved basic

904 residues (asterisks) are condensed.

905

#### 906 **Figure EV2. Fixation conditions did not affect the staining pattern of MTCL2.**

907 A. HeLa-K cells fixed with 4% paraformaldehyde were stained with anti-SOGA1

908 (MTCL2) together with anti- $\alpha$ -tubulin and anti-GS28 antibody. The specificity of anti-

909 SOGA1 signals is indicated by their disappearance in MTCL2-knockdown cells

910 subjected to the same procedures (see a lower left panel). Scale bar: 20  $\mu$ m.

911 B. Boxed regions in (A) are enlarged to examine the colocalization of MTCL2 on the

912 GA and MTs more closely. Scale bar: 10  $\mu$ m.

913 C. HeLa-K cells were fixed with 4% paraformaldehyde after brief treatment of an  
914 extraction buffer containing 0.5% TX-100 and 4 mM EGTA. The specificity of anti-  
915 SOGA1 staining signals is indicated by their disappearance in *MTCL2*-knockdown cells  
916 subjected to the same procedures (see a lower left panel). Scale bar: 20  $\mu$ m.

917 D. The boxed region in (C) is enlarged to examine the colocalization of MTCL2 on the  
918 Golgi and MTs more closely. Scale bar: 10  $\mu$ m.

919

920 **Figure EV3. KR-rich region is the MT-binding region of MTCL2.**

921 A. Subcellular localization of exogenously expressed mMTCL2 and its mutants in  
922 *MTCL2*-knockdown HeLa-K cells. Scale bar: 20  $\mu$ m. The cells expressing exogenous  
923 *MTCL2* at a level several-fold higher than the endogenous *MTCL2* level are shown (see  
924 an inset in an upper left panel in which a staining image of endogenous *MTCL2* in a  
925 HeLa-K cell is shown under the same condition). Boxed regions are enlarged in right  
926 panels. Scale bar: 5  $\mu$ m. Note that *MTCL2*  $\Delta$ KR but not 4LA mutant lost MT  
927 association activities. Intriguingly, in contrast to the N fragment (Fig. 3),  $\Delta$ KR mutant  
928 had no Golgi localization, suggesting that MT binding through the KR-rich region was a  
929 prerequisite for the association of full-length *MTCL2* with the Golgi membrane.

930 B. HeLa-K cells exogenously expressing GFP, GFP-mMTCL1 C-MTBD, or GFP-  
931 mMTCL2 KR were stained with the indicated antibodies. Scale bar: 20  $\mu$ m. Boxed  
932 regions are enlarged in right panels. Scale bar: 5  $\mu$ m. Note that, in contrast to *MTCL2*  
933 KR, *MTCL1* C-MTBD strongly induced tubulin acetylation and MT bundling.  
934 Quantitative comparison of acetylated tubulin signals in the insets after normalization  
935 by GFP and  $\alpha$ -tubulin signal intensities is shown on the left.

936

937 **Figure EV4. MTCL2 promotes clustering of the Golgi stacks in a Golgi-**  
938 **association-dependent manner.**

939 A. HeLa-K cells stably harboring pOSTet15.1 expression vector for mouse MTCL2  
940 were transfected with siRNAs for control or MTCL2 knockdown (#2) in the presence or  
941 absence of 100 nM doxycycline and doubly stained with anti-SOGA1 (MTCL2) and  
942 anti-GM130 antibodies, as indicated on the left. Note that cells subjected to control  
943 RNAi show compact Golgi ribbon structures at one side of the perinuclear region. Such  
944 Golgi ribbon structures become laterally expanded around the nucleus in MTCL2-  
945 knockdown cells (-dox), whereas exogenous expression of RNAi-resistant MTCL2  
946 (+dox) strongly restores their compactness. Scale bar: 20  $\mu\text{m}$ .

947 B. Quantification of Golgi ribbon expanding angle ( $\theta$ ) around the nuclei (top panel) in  
948 each condition. Bottom is a box plot of the angle distribution in each condition. The  
949 lines within each box represent medians. Data represent the results of the indicated  
950 number (n) of cells from a typical experiment (biological replicates). The *p* values were  
951 estimated using the Wilcoxon test. Statistical data of technical replicates (three  
952 independent experiments) are demonstrated in Appendix Fig. S4.

953 C. A model explaining how MT accumulation secondarily increases clustering of  
954 individual Golgi stacks.

955 D. HeLa-K cells stably harboring pOSTet15.1 expression vector for mouse MTCL2  
956 4LA were subjected to the same experimental procedure as in (A). Note that  
957 compactness of Golgi ribbon was not restored by expression of mouse MTCL2 4LA.  
958 Scale bar: 20  $\mu\text{m}$ .

959 E. Quantitative analysis as in (B).

960

961 **Figure EV5. MT-binding activity is also required for MTCL2 function to facilitate**  
962 **the perinuclear accumulation of MTs and the Golgi ribbon compactness.**

963 HeLa-K cells stably harboring pOSTet15.1 expression vector for mouse MTCL2  $\Delta$ KR  
964 were transfected with siRNAs for control or MTCL2 knockdown (#2) in the presence or  
965 absence of 100 nM doxycycline (dox). Perinuclear accumulation of MTs (A and B) and  
966 expansion of the Golgi ribbon around the nucleus (C and D) were analyzed in the same  
967 manner as described in Fig. 5 and Fig. EV4 legends. Scale bar: 20  $\mu$ m.

968

### Expanded View Movie Legends

969

970 **Movie EV1. Wound healing of RPE1 cells subjected to control knockdown.**

971 Differential interference contrast images of cells were taken every 10 min for 440 min.

972 The video speed is 6 fps. Representative frames of this movie are shown in Fig. 6B.

973

974 **Movie EV2. Wound healing of RPE1 cells subjected to *MTCL2* knockdown.** Data

975 were collected as described in the Supplementary Movie 1 legend. Representative

976 frames of this movie are shown in Fig. 6B.

977

978

# Figure 1

**A**

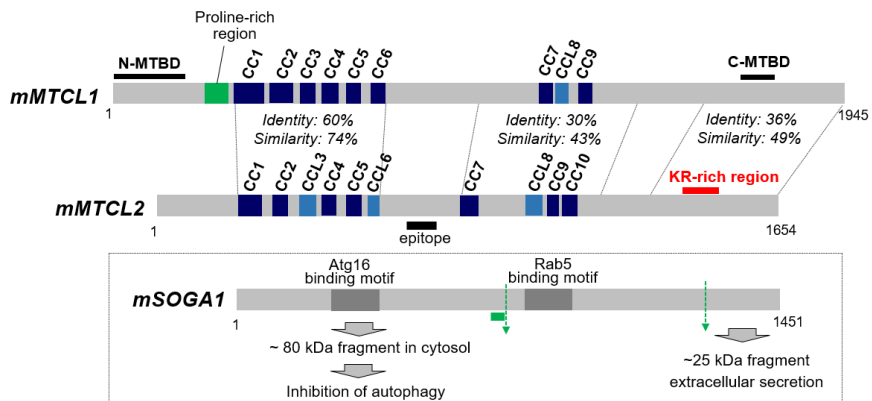

**B**

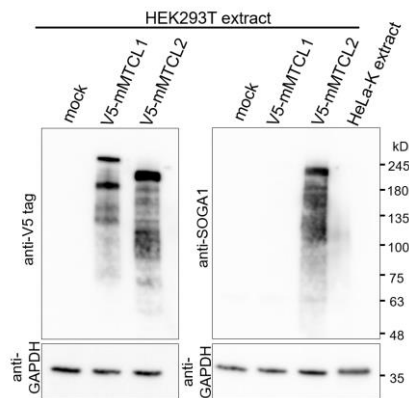

**C**

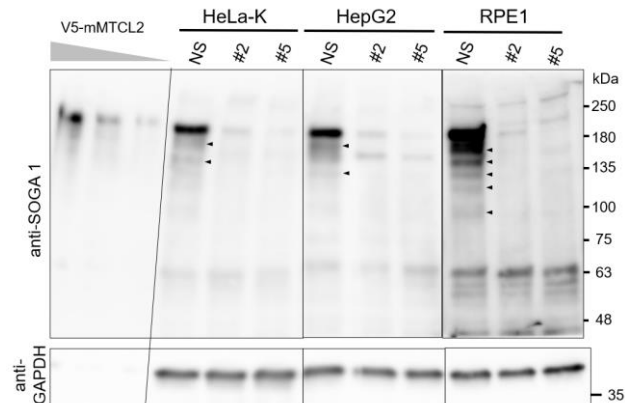

**D**

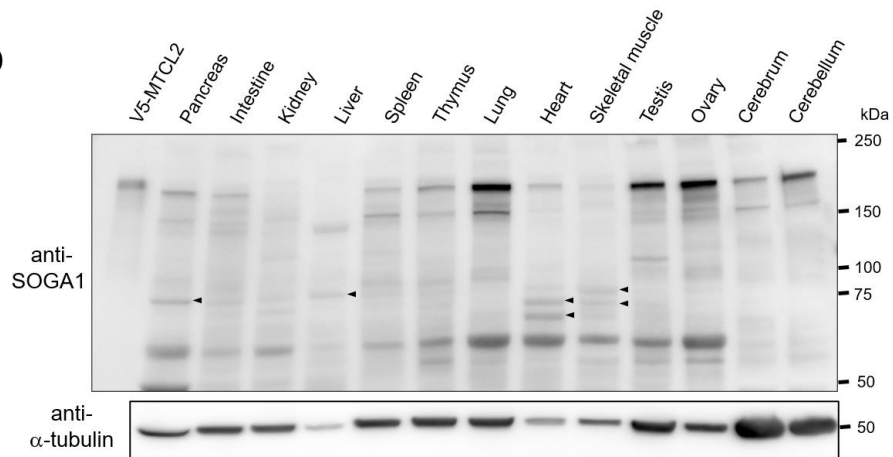

Figure 2

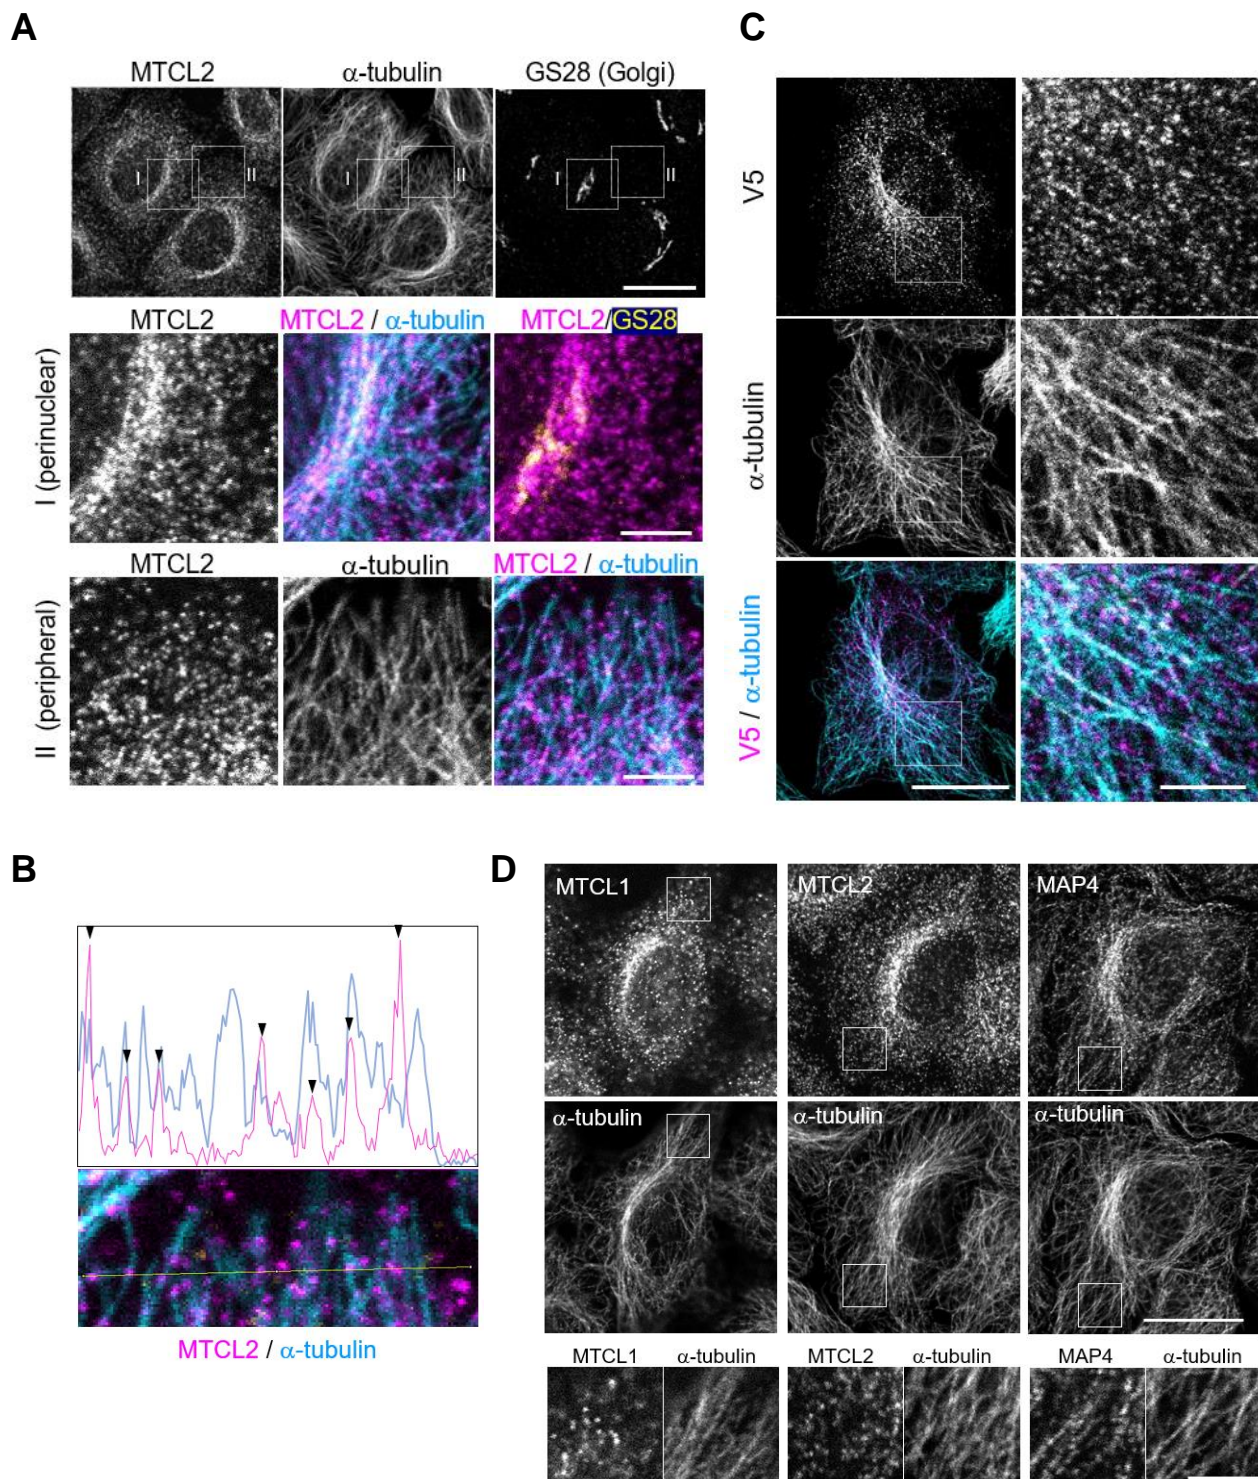

Figure 3

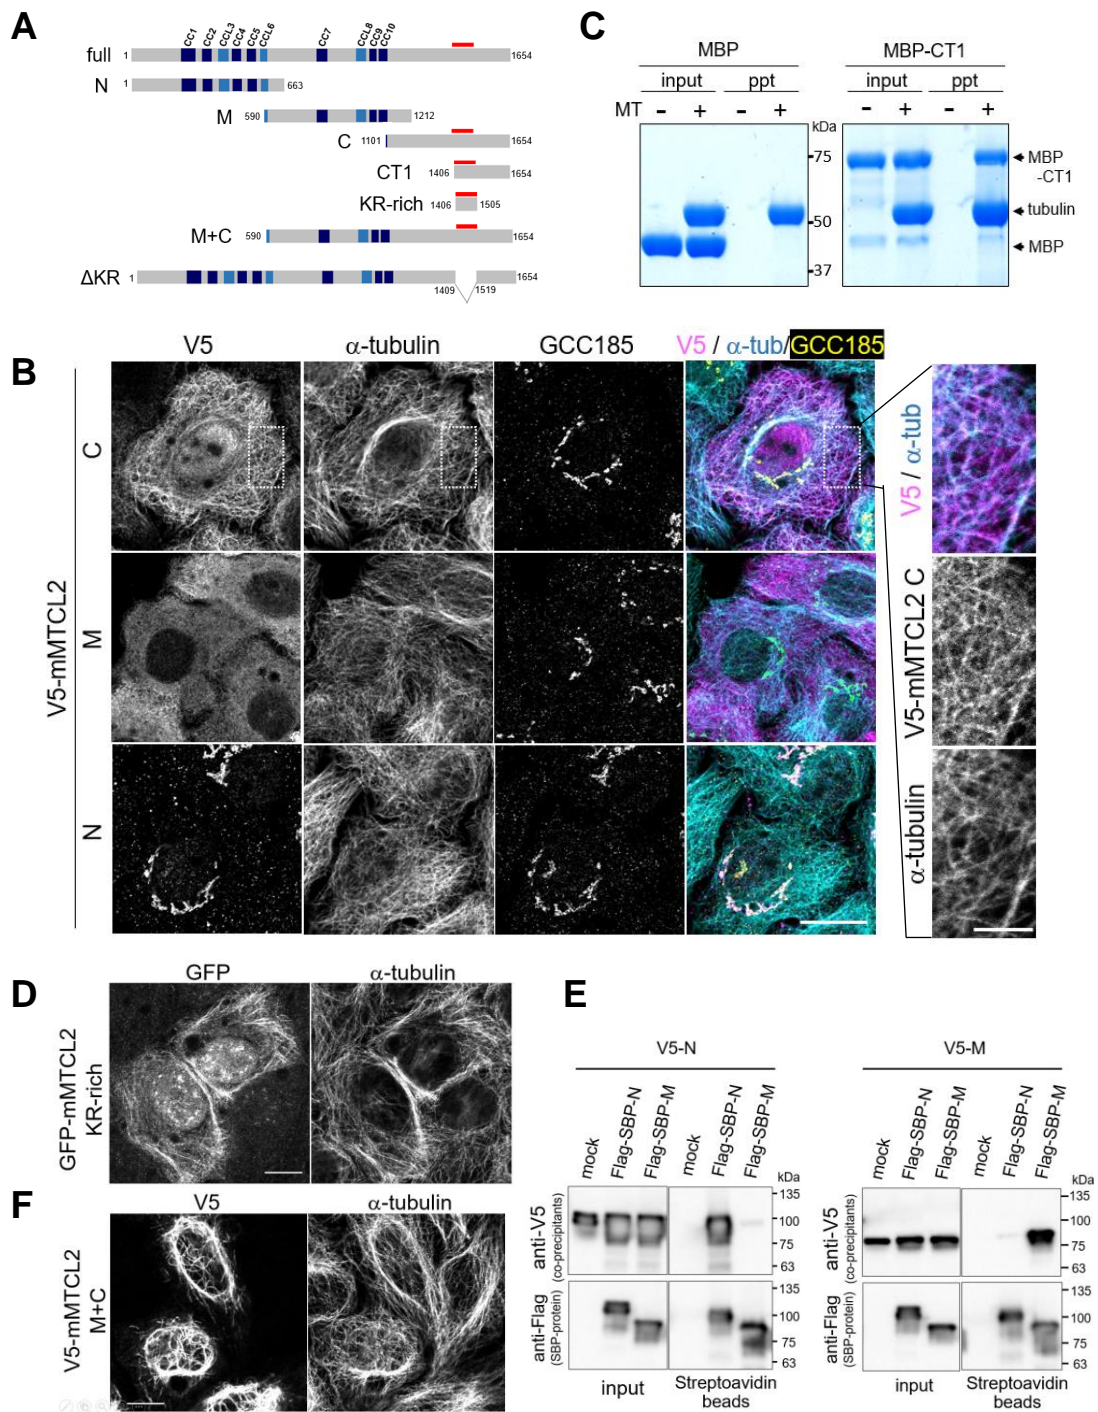



Figure 4

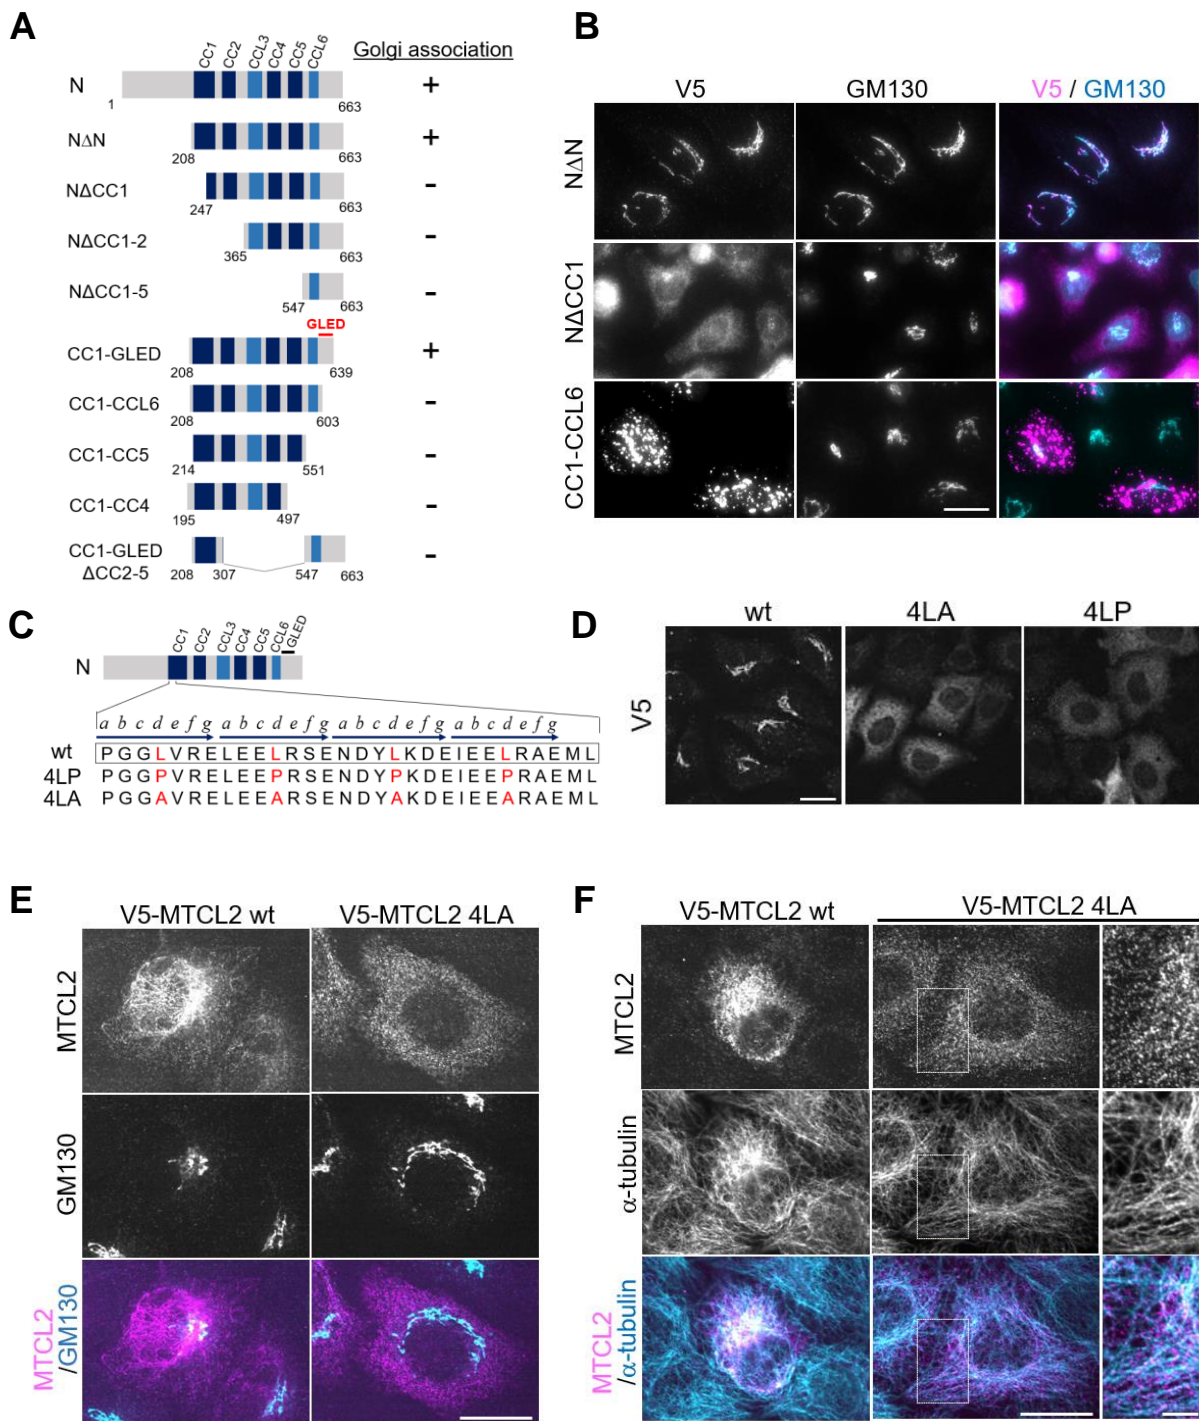

Figure 5

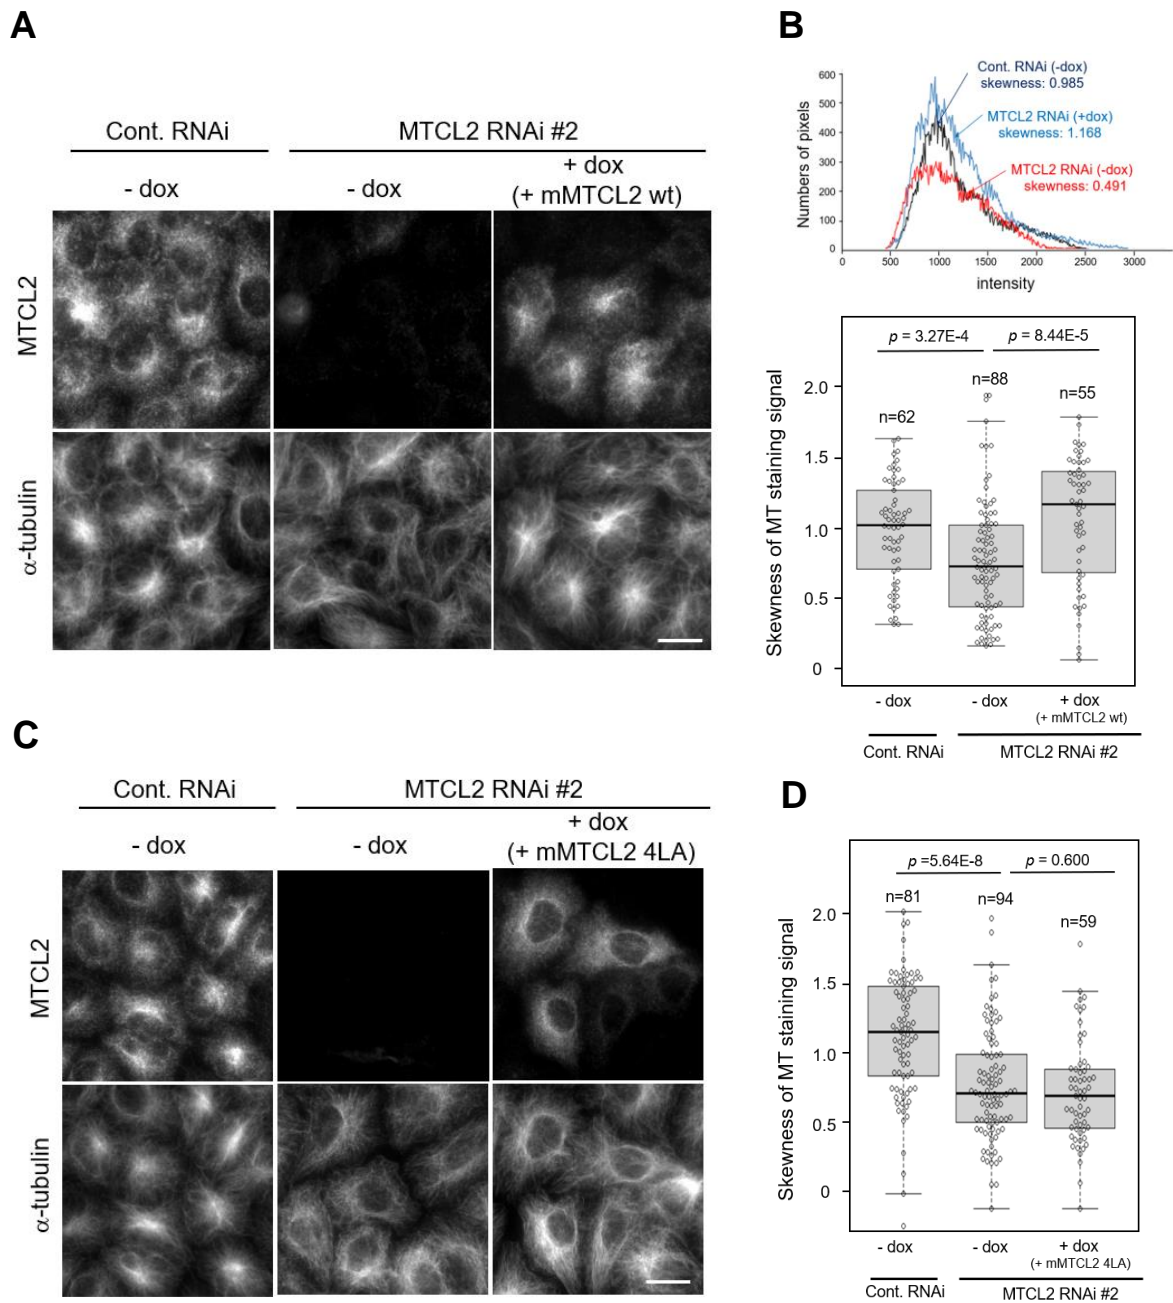

Figure 6

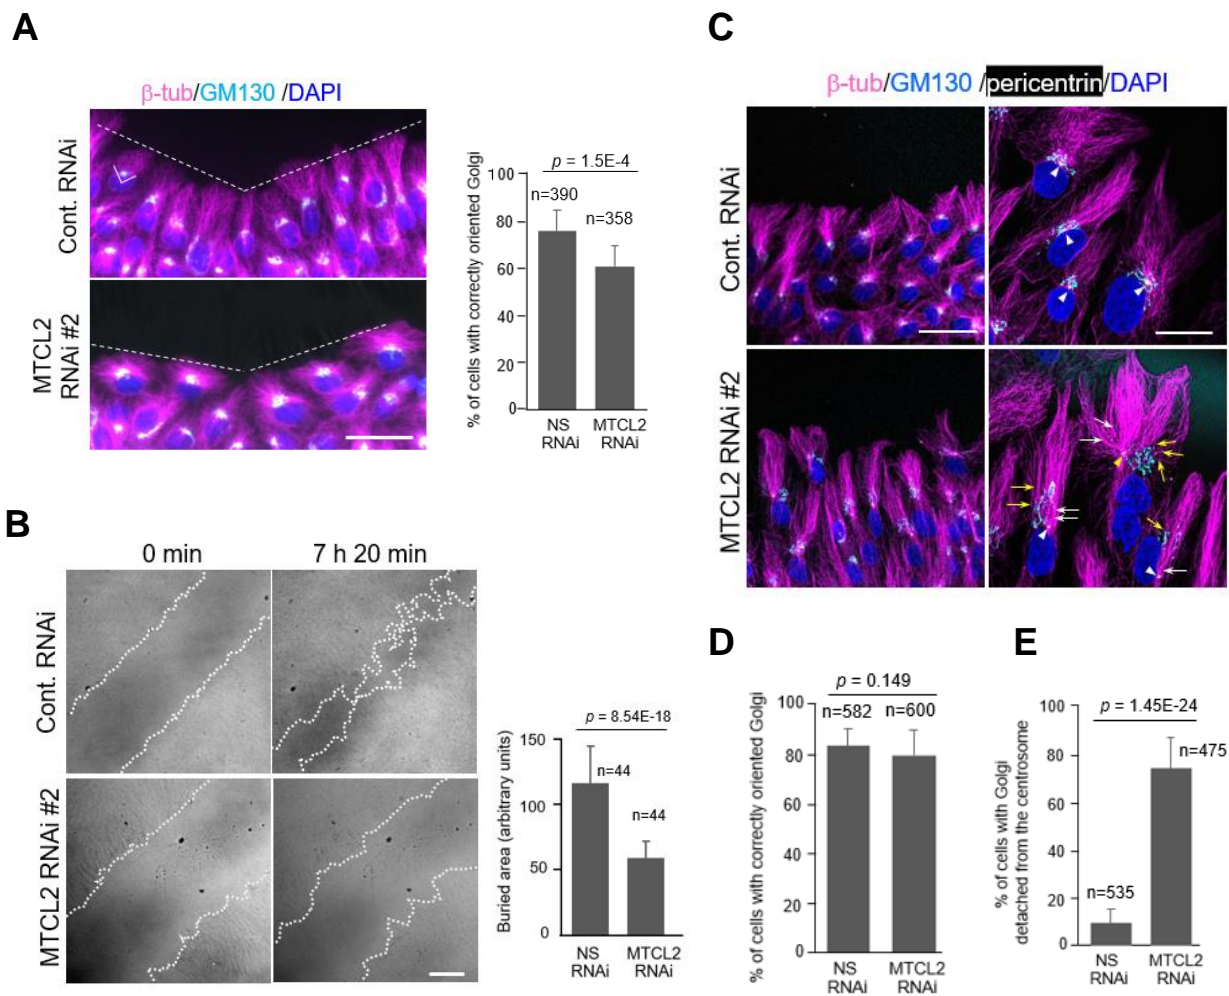

Figure 7

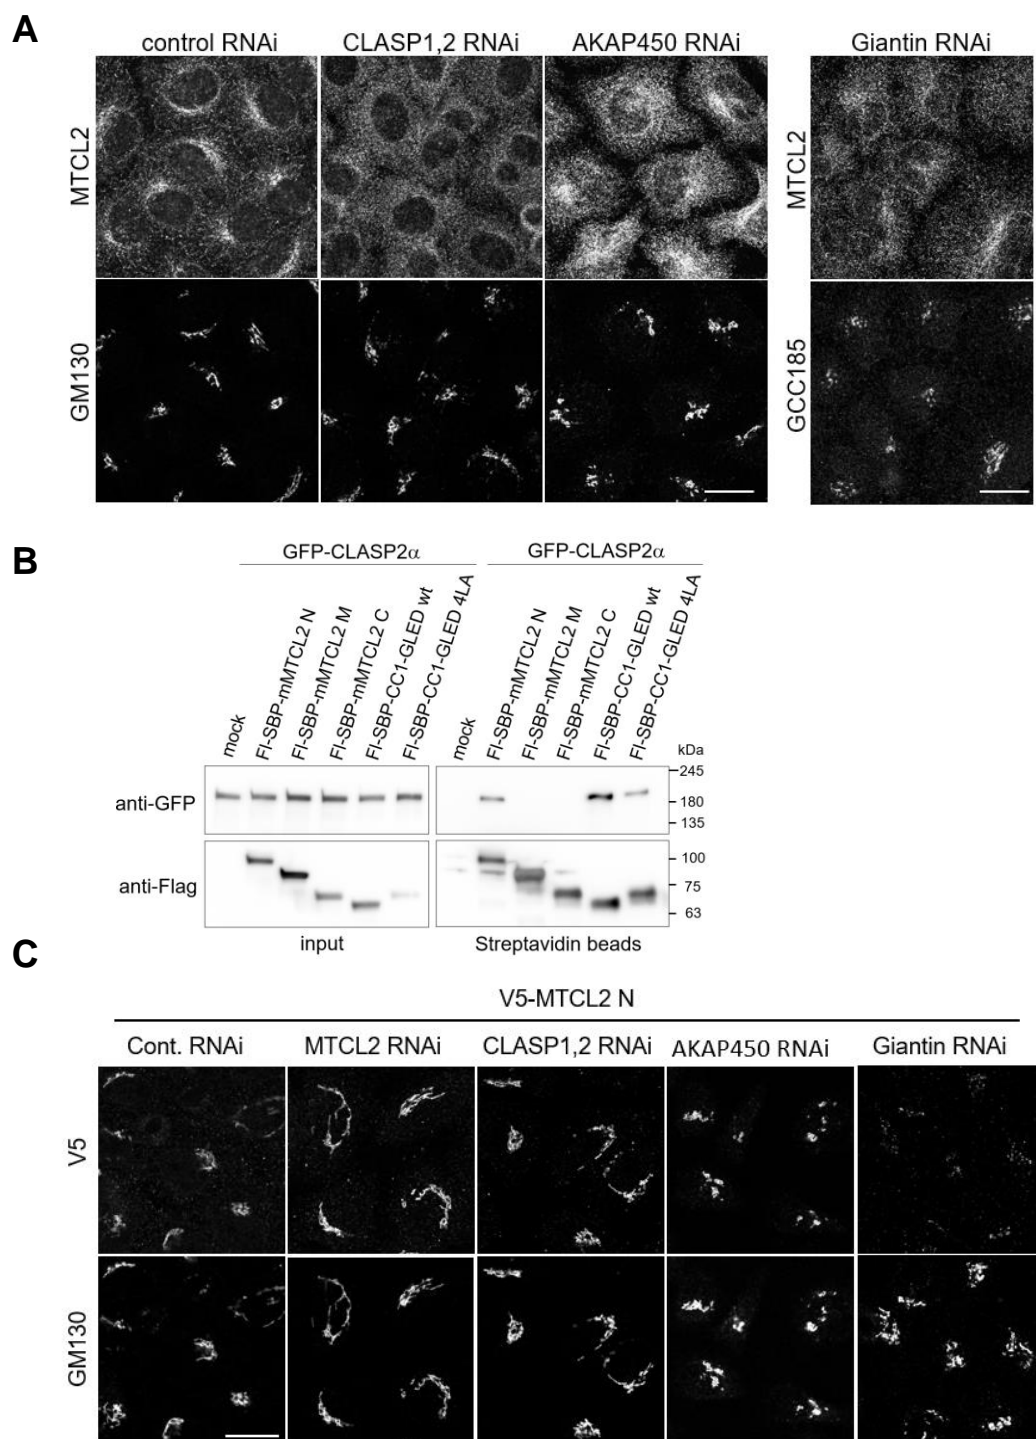

# Figure EV1

**A**

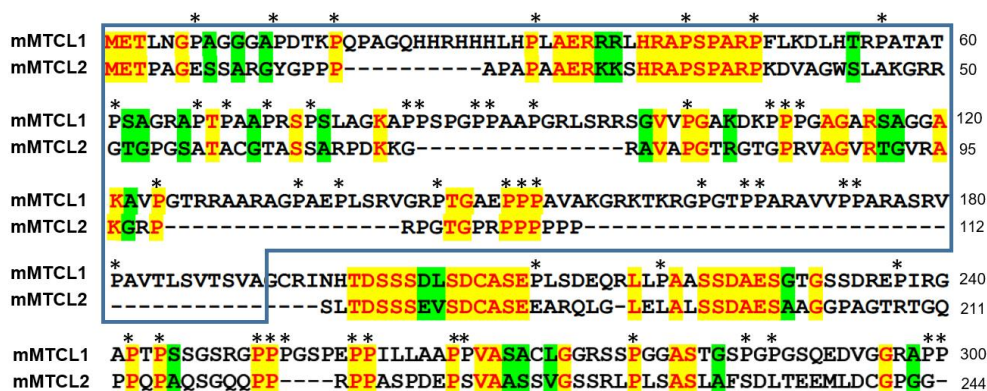

**B**

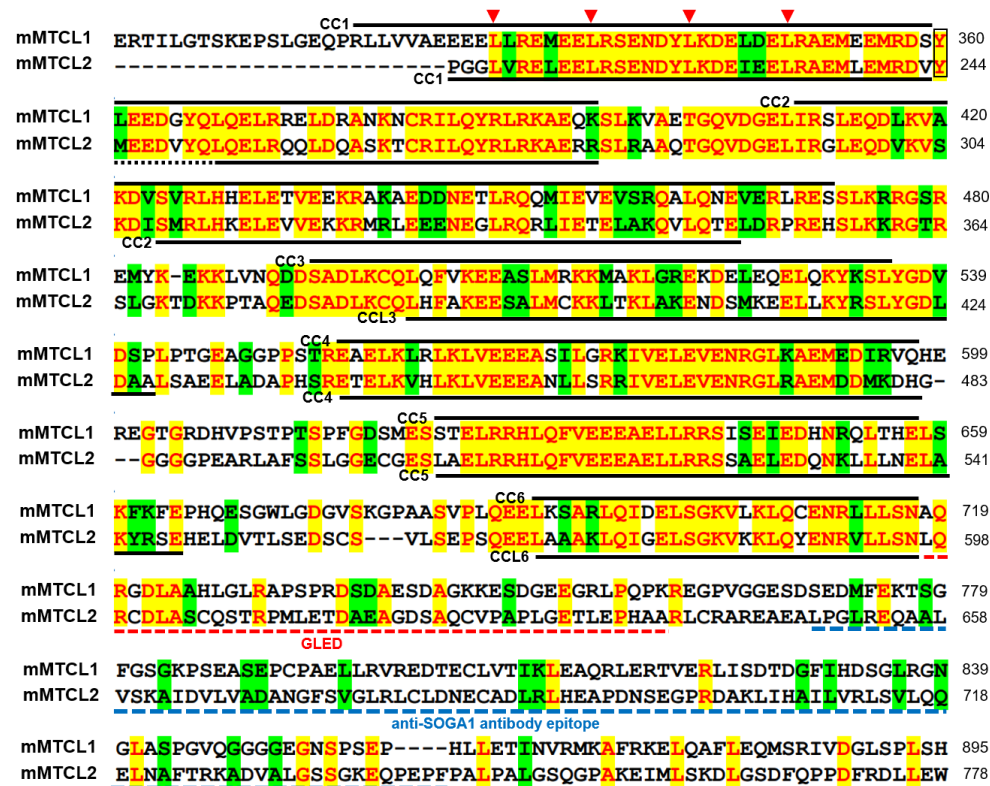

**C**

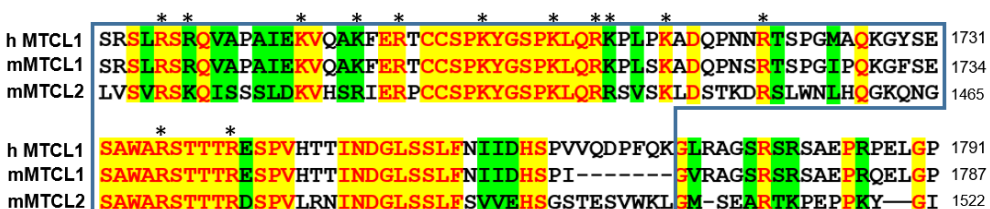

# Figure EV2

**A**

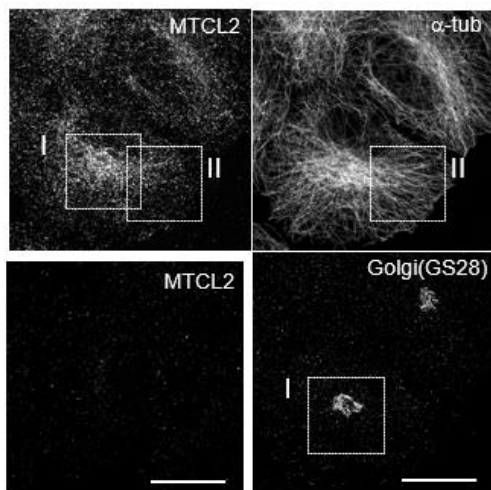

**B**

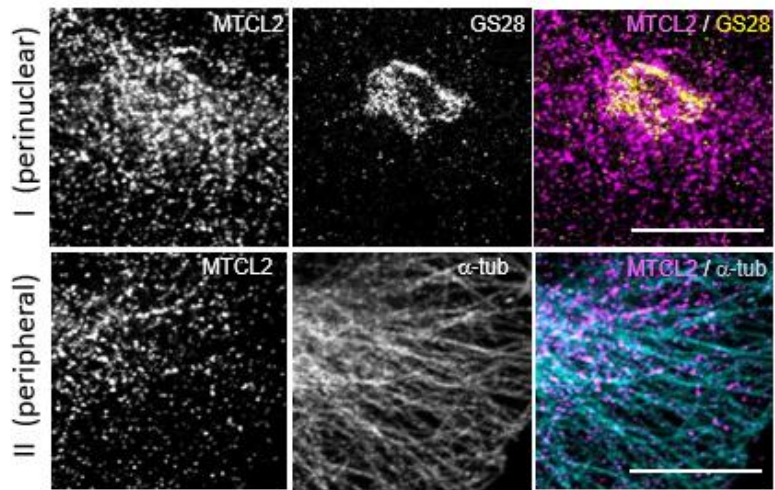

**C**

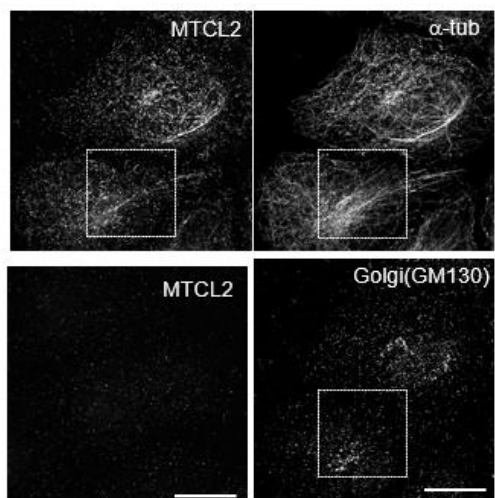

**D**

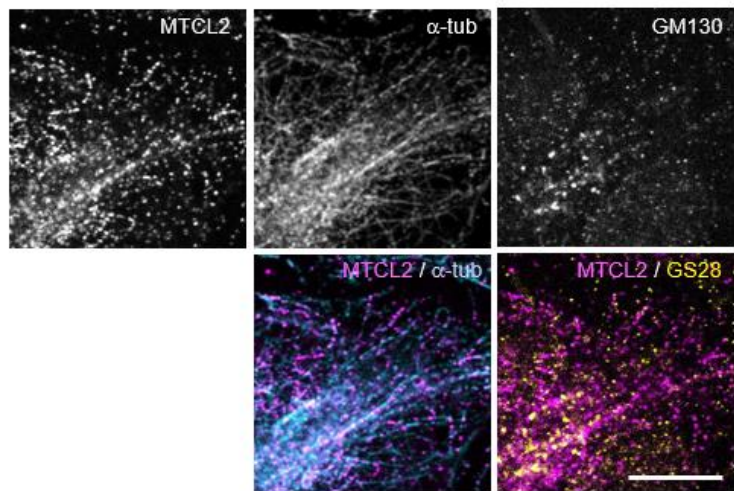

Figure EV3

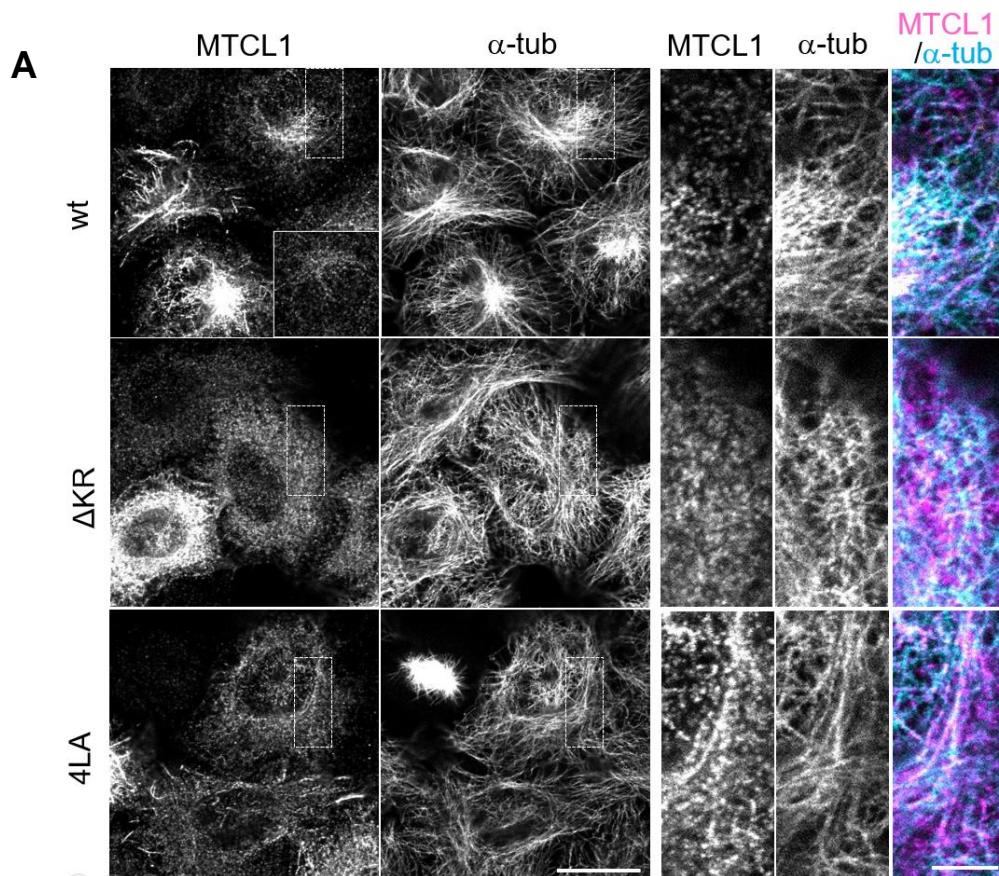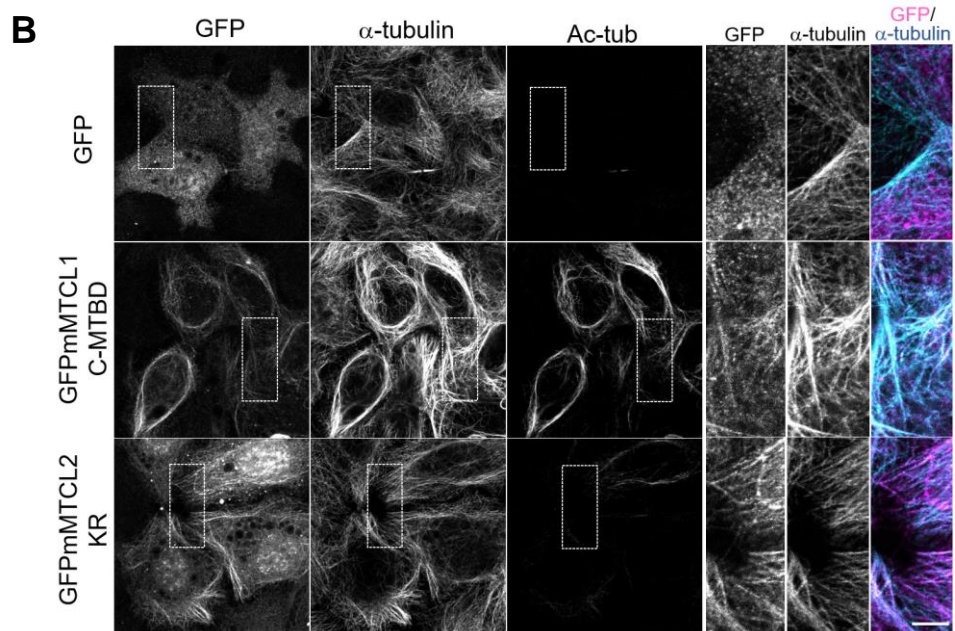

Figure EV4

**A**

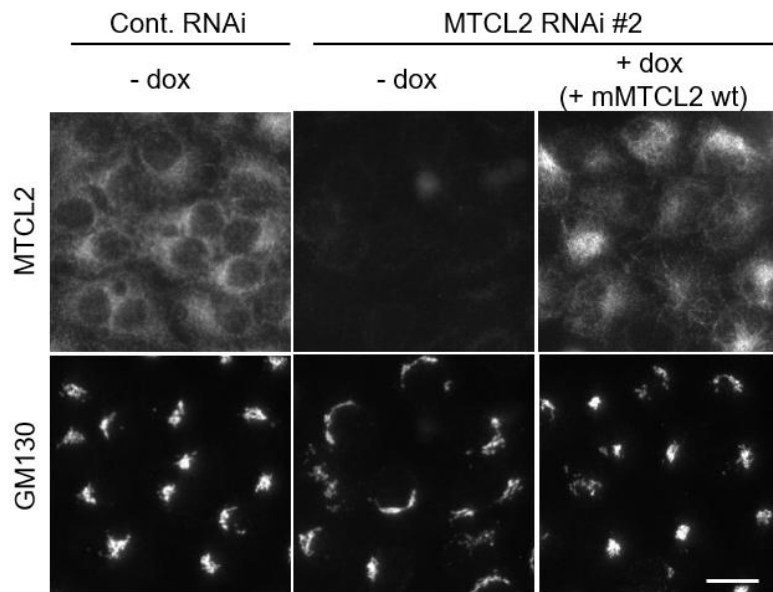

**C**

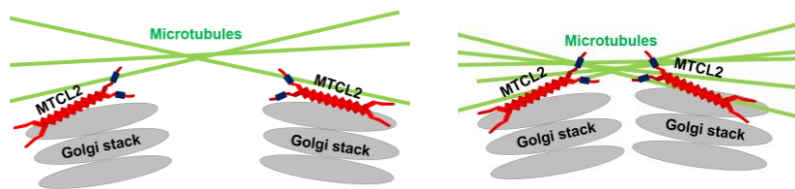

**D**

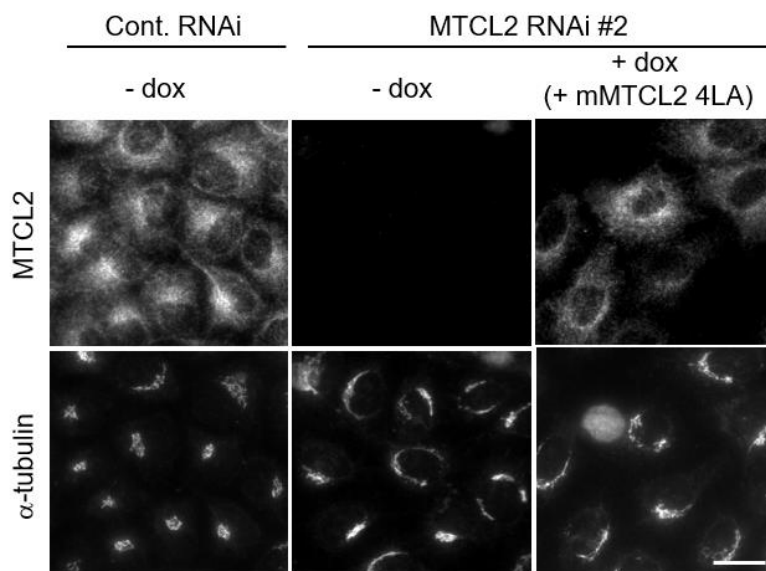

**B**

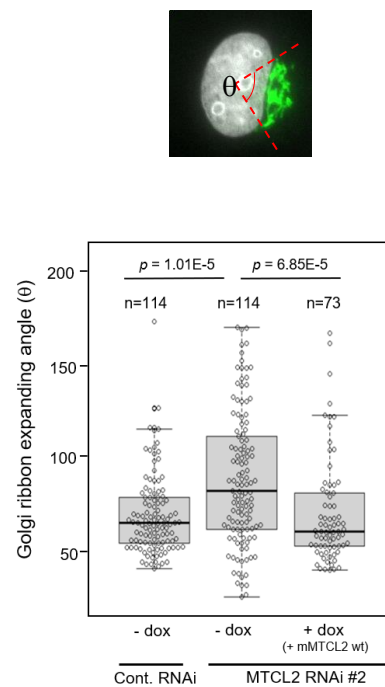

**E**

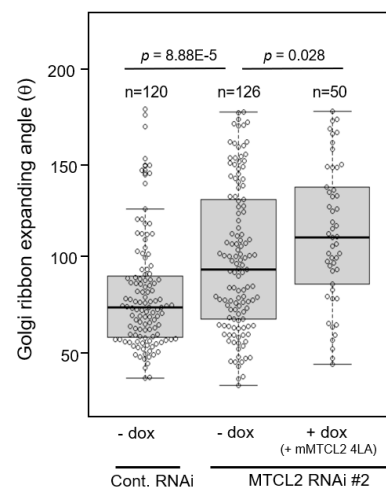



Figure EV5

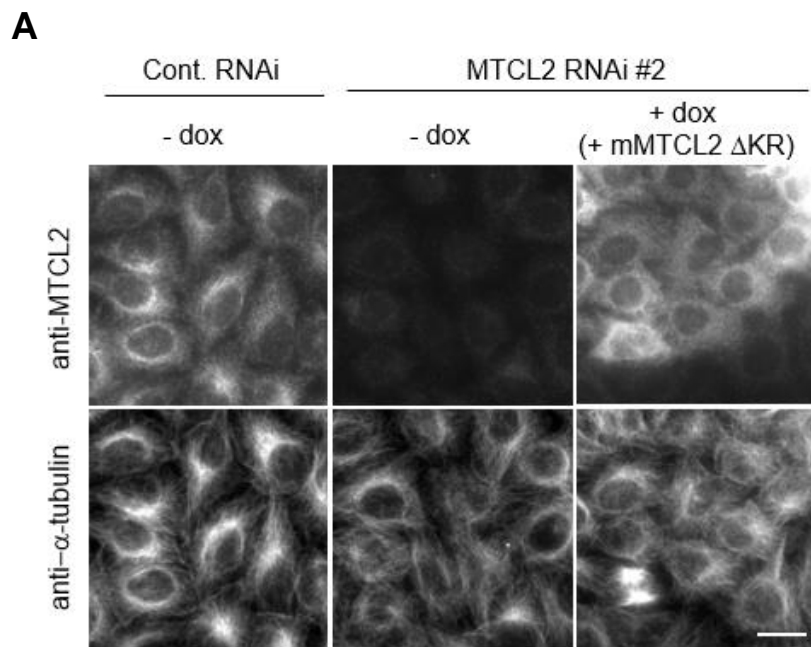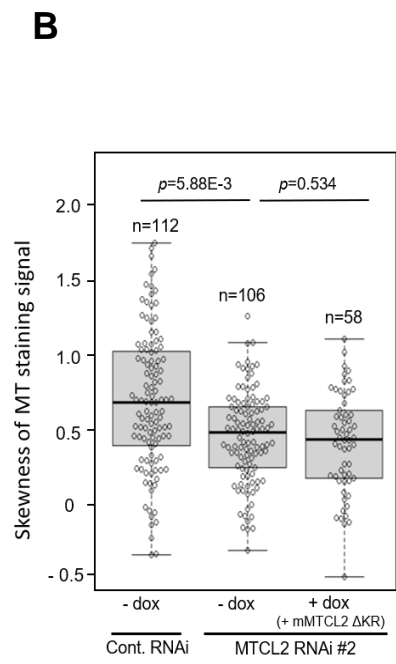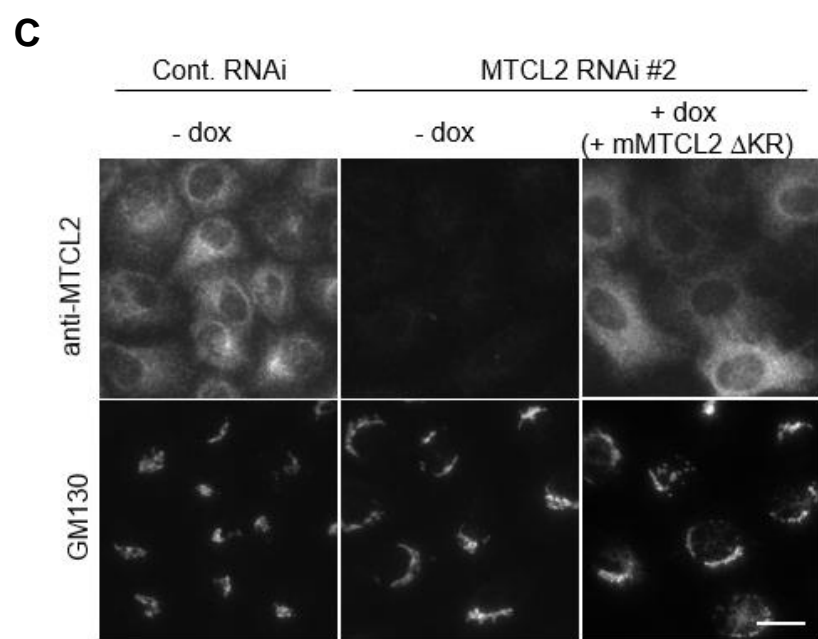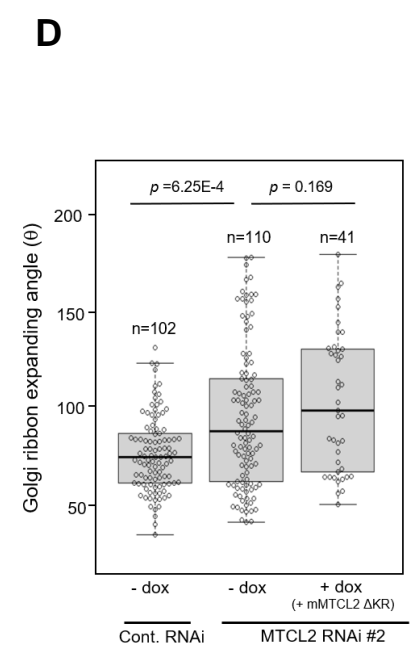

# Appendix Figure S1

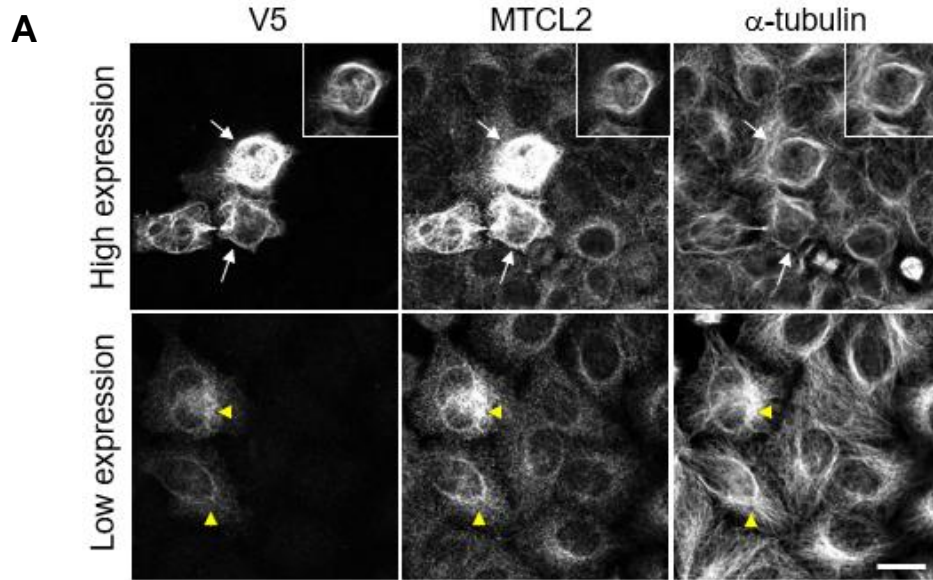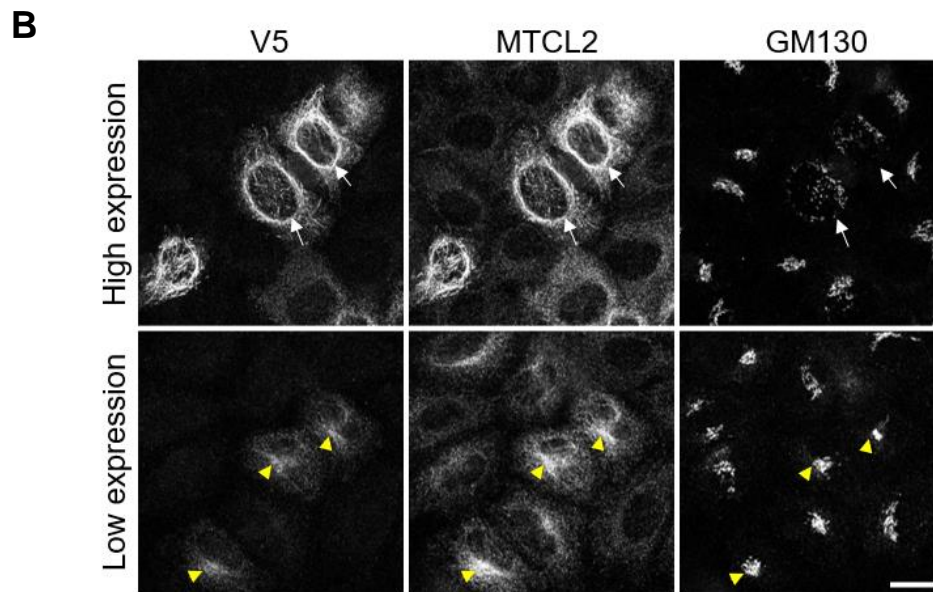

**Appendix Figure S1. Localization of exogenously expressed MTCL2 mimics that of endogenous proteins at low expression levels.**

HeLa-K cells stably harboring 6xV5-tagged mouse MTCL2 expression vector (pOSTet15.1) were cultured in the presence of 100 ng/mL doxycycline and stained with the indicated antibodies. Scale bar: 20  $\mu$ m. Arrows indicate cells highly expressing exogenous MTCL2, whereas yellow arrowheads indicate cells expressing exogenous MTCL2 at a level comparable to endogenous MTCL2. The insets in (A) show alternative images of a cell located at the center of the panel, in which contrasts of the individual staining signals are adjusted separately to provide unsaturated images.

# Appendix Figure S2

## A

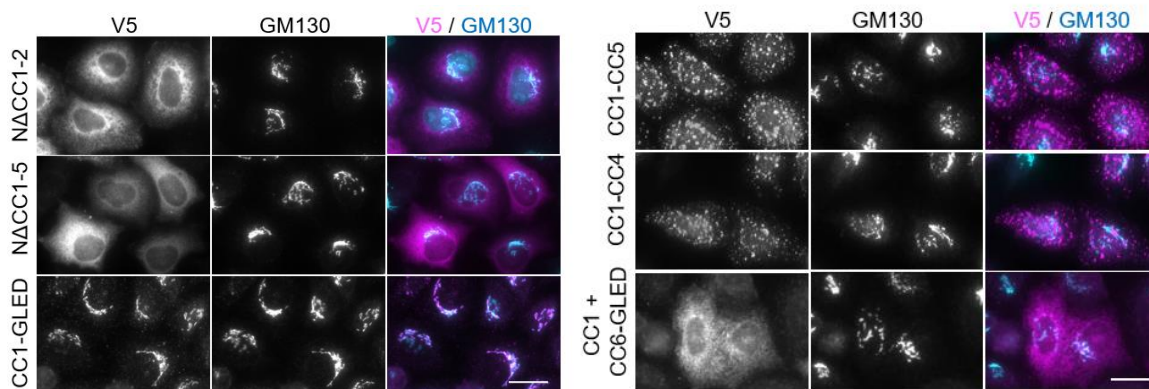

## B

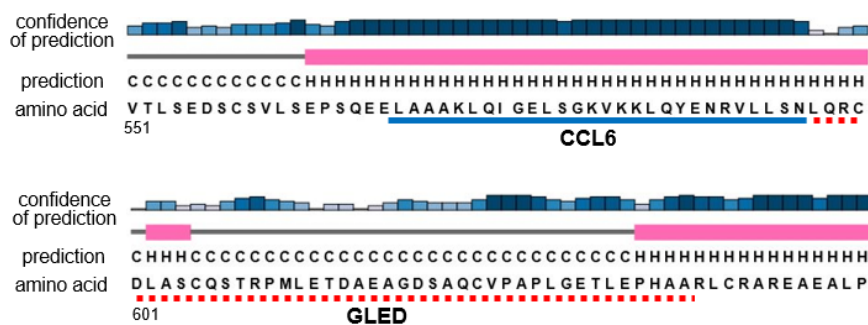

## C

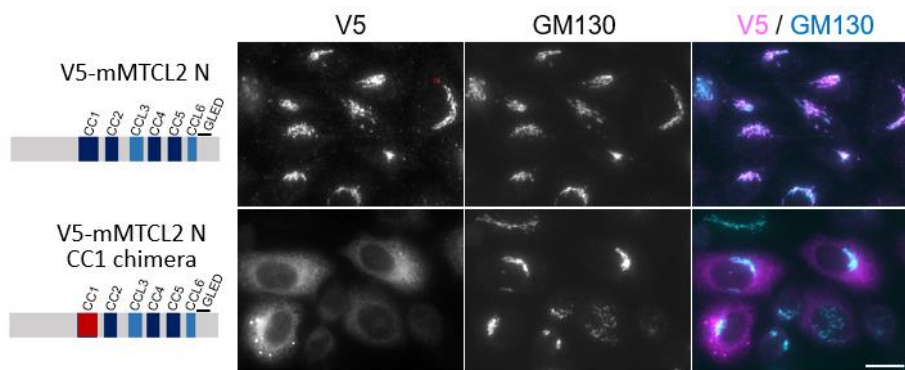

mMTCL1 EEEI**LVRE**EEELRSENDYLKDE**LD**ELRAEMEEMRDSY**EEEDGYQLOQLR**RELD**RAN**KNCRILQYRLRKA**EQSLKVAE**TGQVDGELIR

mMTCL2 PGG**LVRE**EEELRSENDYLKDE**LD**ELRAEMEEMRDVY**EEEDVYQLOQLR**QQLD**QAS**KT**CR**ILQYRLRKA**ERRSLRA**QTGQVDGELIR

chimera PGG**LVRE**EEELRSENDYLKDE**LD**ELRAEMEEMRDSY**EEEDGYQLOQLR**RELD**RAN**KNCRILQYRLRKA**EQSLKVAE**TGQVDGELIR

← **CC1** →

**Appendix Figure S2. The essential sequence required for the Golgi association of the MTCL2 N fragment.**

A. Subcellular localization of the indicated mutants expressed in HeLa-K cells ( Fig. 4A). Scale bar: 20  $\mu\text{m}$ .

B. The amino acid sequence of GLED and its secondary structure predicted using PSIPED (<http://bioinf.cs.ucl.ac.uk/psipred/>).

C. Subcellular localization of the CC1 chimera of the N fragment, in which the highly conserved CC1 sequence of MTCL2 was seamlessly exchanged with that of MTCL1. Scale bar, 20  $\mu\text{m}$ . The amino acid sequence of CC1 in the chimera mutant is shown below.

# Appendix Figure S3

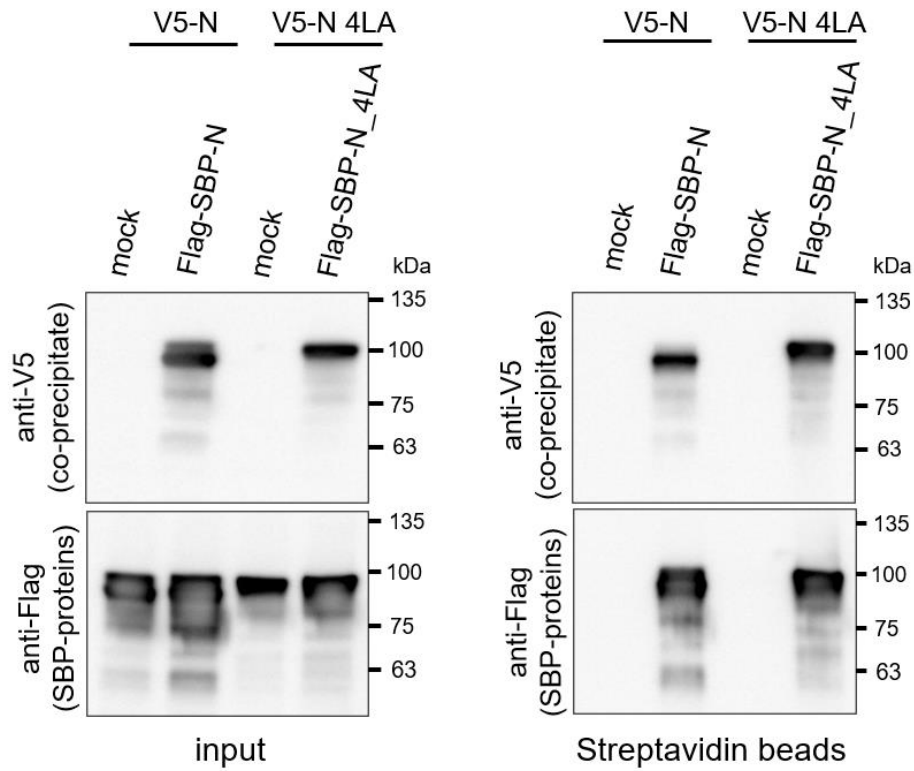

**Appendix Figure S3. The 4LA mutation does not interfere with the homo-oligomerization activity of N fragment.**

A streptavidin pull-down experiment was performed for soluble extracts (input) of HEK293 cells expressing V5-N with Flag-SBP-N or V5-N 4LA with Flag-SBP-N 4LA, as indicated. In mock samples, empty backbone vectors for Flag-SBP constructs were transfected with each V5 construct.

# Appendix Figure S4

**A**

| MT distribution (skewness) |     |     |         |          |           | Golgi ribbon expansion angle |     |     |         |                       |                       |
|----------------------------|-----|-----|---------|----------|-----------|------------------------------|-----|-----|---------|-----------------------|-----------------------|
| n                          |     |     | p-value |          |           | n                            |     |     | p-value |                       |                       |
| wt                         |     |     |         |          |           | wt                           |     |     |         |                       |                       |
|                            | NS  | KD  | res     | NS/KD    | KD/rescue |                              | NS  | KD  | res     | NS/KD                 | KD/rescue             |
| 1st                        | 56  | 56  | 23      | 1.50E-04 | 2.03E-03  | 1st                          | 196 | 149 | 196     | 2.77E-13              | 2.20E-16 <sup>#</sup> |
| 2nd                        | 99  | 79  | 58      | 3.96E-07 | 8.40E-03  | 2nd                          | 358 | 339 | 177     | 2.20E-16 <sup>#</sup> | 2.20E-16 <sup>#</sup> |
| 3rd                        | 62  | 88  | 55      | 3.27E-04 | 8.44E-05  | 3rd                          | 114 | 114 | 73      | 1.01E-05              | 6.85E-05              |
| sum                        | 217 | 223 | 136     | 5.77E-10 | 1.71E-06  | sum                          | 668 | 602 | 446     | 2.20E-16 <sup>#</sup> | 2.20E-16 <sup>#</sup> |
| 4LA                        |     |     |         |          |           | 4LA                          |     |     |         |                       |                       |
|                            | NS  | KD  | res     | NS/KD    | KD/rescue |                              | NS  | KD  | res     | NS/KD                 | KD/rescue             |
| 1st                        | 81  | 94  | 51      | 5.64E-08 | 0.600     | 1st                          | 85  | 65  | 47      | 6.85E-12              | 0.579                 |
| 2nd                        | 123 | 93  | 71      | 1.86E-03 | 0.270     | 2nd                          | 134 | 79  | 68      | 4.00E-11              | 0.766                 |
| 3rd                        | 77  | 125 | 93      | 0.050    | 0.890     | 3rd                          | 120 | 126 | 50      | 8.88E-05              | 0.028 <sup>*</sup>    |
| sum                        | 281 | 312 | 215     | 7.46E-11 | 0.984     | sum                          | 339 | 270 | 165     | 2.20E-16              | 0.265                 |
| $\Delta$ KR                |     |     |         |          |           | $\Delta$ KR                  |     |     |         |                       |                       |
|                            | NS  | KD  | res     | NS/KD    | KD/rescue |                              | NS  | KD  | res     | NS/KD                 | KD/rescue             |
| 1st                        | 65  | 56  | 45      | 2.01E-02 | 0.490     | 1st                          | 95  | 81  | 56      | 1.60E-09              | 0.698                 |
| 2nd                        | 112 | 106 | 58      | 5.88E-05 | 0.534     | 2nd                          | 83  | 113 | 88      | 4.31E-03              | 1.95E-03 <sup>*</sup> |
| 3rd                        | 73  | 106 | 47      | 7.37E-03 | 0.072     | 3rd                          | 102 | 110 | 41      | 6.25E-04              | 0.169                 |
| sum                        | 250 | 268 | 150     | 1.07E-07 | 0.1056    | sum                          | 280 | 304 | 185     | 1.32E-12              | 3.64E-03 <sup>*</sup> |

**B**

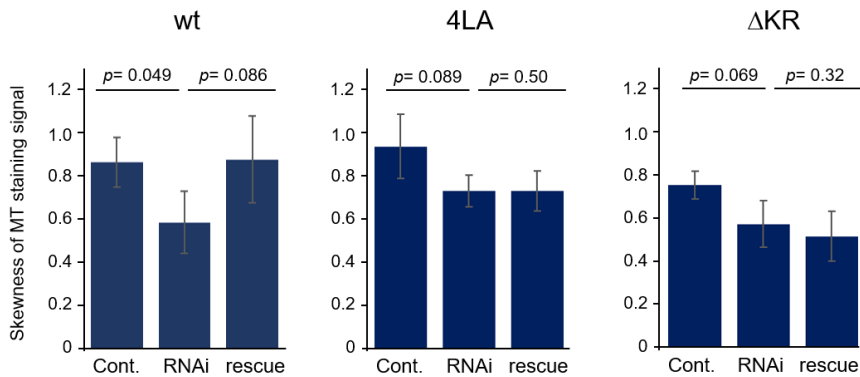

**C**

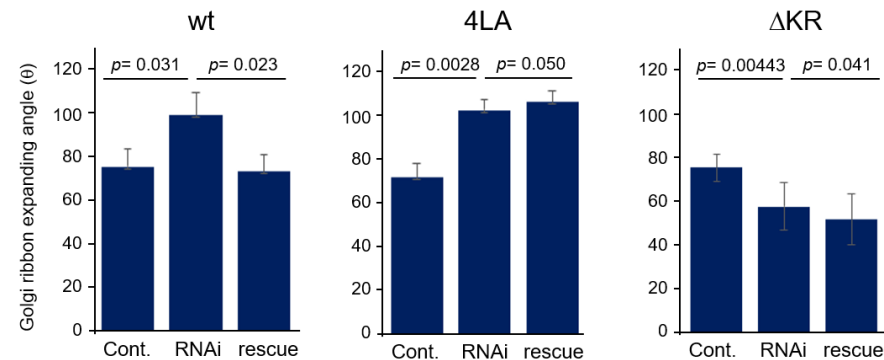

#### **Appendix Figure S4. Statistical data for technical replicates of the rescue experiments.**

A. Numbers of biological replicates ( $n$ ) and  $p$  values estimated by the Wilcoxon test are listed for each rescue experiment replicated three times. Left, experiments used to examine rescue activity for MT distribution. Right, Golgi ribbon compactness. The  $p$  values indicated by # mean less than  $2.20 \times 10^{-16}$ . Expression of MTCL2 mutants (4LA,  $\Delta$ KR) tended to worsen the knockdown phenotypes of MTCL2, sometimes resulting in low  $p$  values in KD/rescue comparison, as indicated by asterisks. Note that essential trends of each MTCL2 mutant shown in Fig. 5 and Figs. EV4 and 5 are highly reproduced except in an experiment (yellow cell) in which the MTCL2-knockdown effect was rather low.

B, C. Mean of biological replicates in each experiment listed in (A) was averaged in three technical replicates and compared between each condition. Data represent the mean  $\pm$  S.D. of three independent experiments for MT distribution (B) and Golgi ribbon compactness (C). The  $p$  value was estimated using Student's t-test assuming a one-tailed distribution and two-sample unequal variance.



# Appendix Figure S5

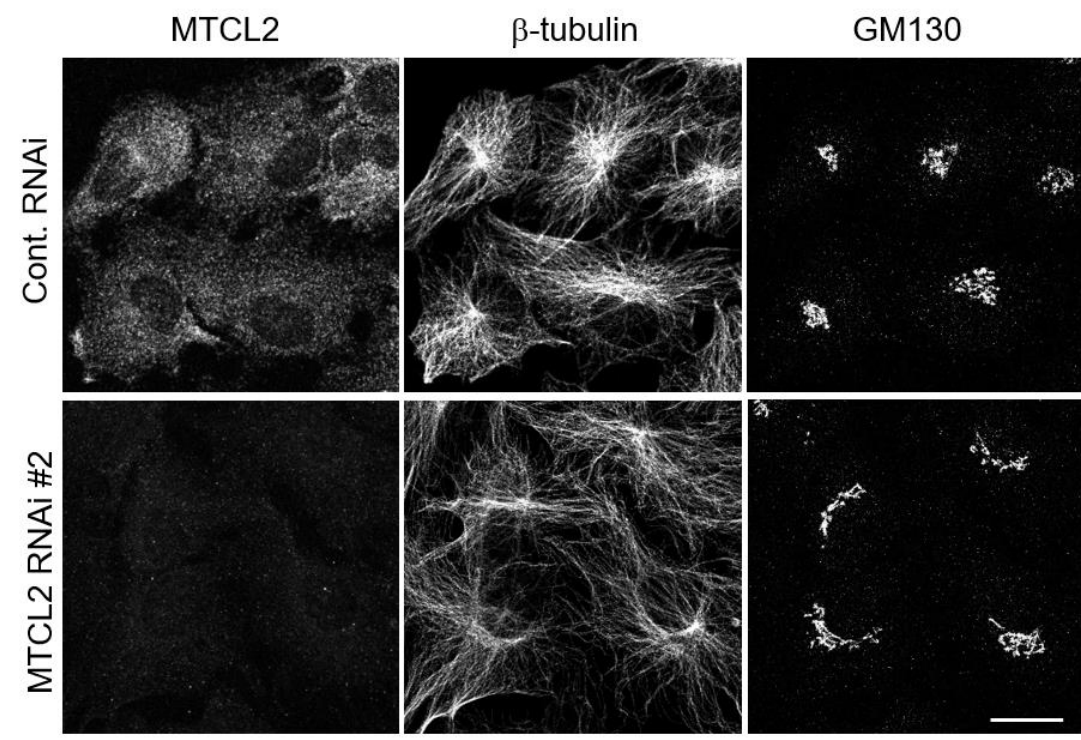

**Appendix Figure S5. Effects of *MTCL2* knockdown on RPE1 cells.**

RPE1 cells transfected with control or *MTCL2* siRNAs were subjected to immunofluorescence analysis using the indicated antibodies. Note that reduced accumulation of MTs around the Golgi and lateral expansion of the Golgi ribbon were observed in this cell line. Scale bar: 20  $\mu$ m.

# Appendix Figure S6

**A**

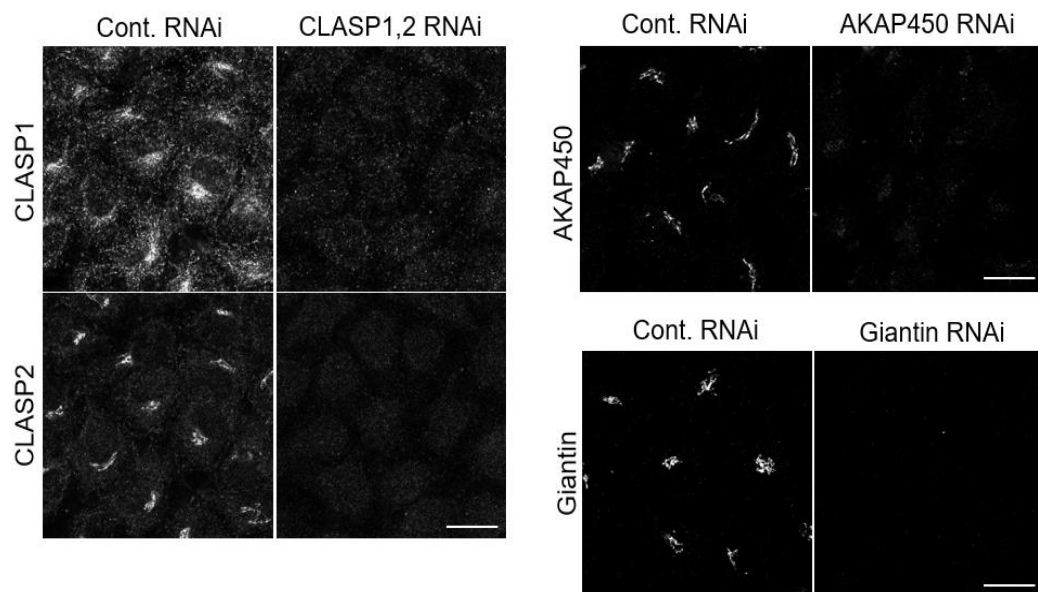

**B**

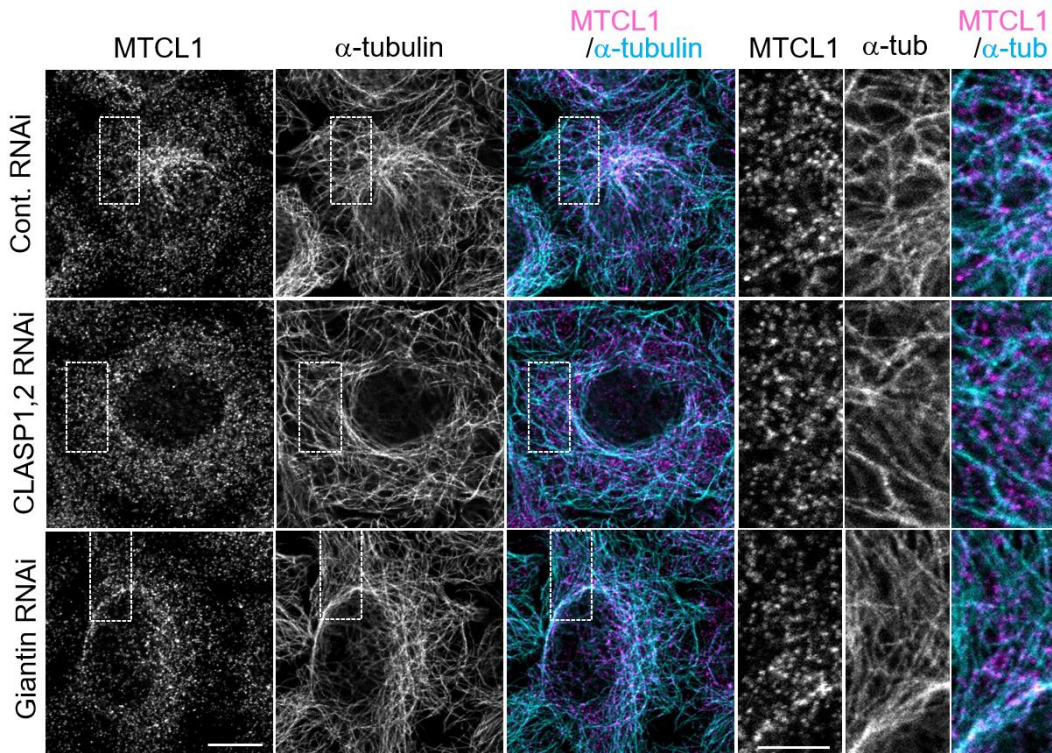

**Appendix Figure S6. Effects of CLASP, AKAP450, and giantin knockdown through RNAi in cells.**

A. Reduced expression of target proteins of the indicated siRNAs is shown. Scale bar: 20  $\mu\text{m}$ .

B. Colocalization of endogenous MTCL2 with MTs in the indicated knockdown cells was examined in HeLa-K cells. Scale bar: 10  $\mu\text{m}$ . Boxed regions are enlarged in the right panels. Scale bar: 5  $\mu\text{m}$ .

# Appendix Figure S7

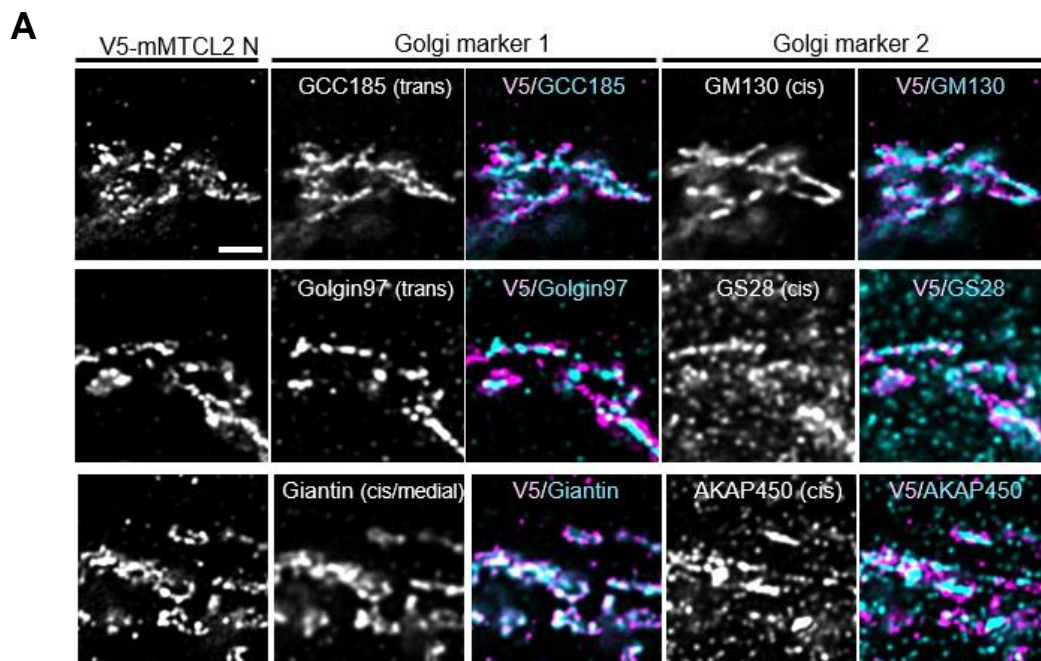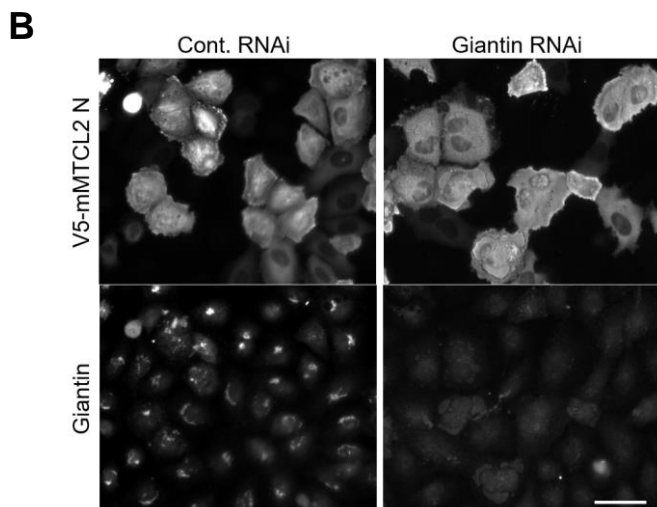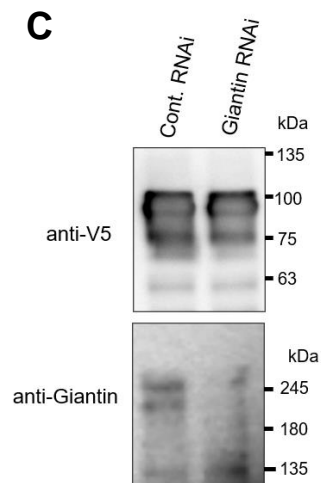

**Appendix Figure S7. Giantin is involved in the Golgi association of the MTCL2 N fragment.**

A. Subcellular localization of V5-mMTCL2 N fragment in HeLa-K cells was compared with that of Golgi-resident proteins using super-resolution microscopy. Scale bar: 2 $\mu$ m. Note that the N-terminal fragment of MTCL2 shows colocalization with the cis/medial Golgi protein giantin/GOLGB1 most clearly. The fragment showed distinct localization from cis Golgi marker proteins, suggesting that it is mainly associated with the medial Golgi cisternae.

B. Levels of V5-mMTCL2 N fragment in control and giantin-knockdown cells were compared through immunostaining analysis using the indicated antibodies after paraformaldehyde fixation, which prevented leakage of cytosolic protein during fixation. Scale bar: 50  $\mu$ m.

C. Levels of V5-mMTCL2 N fragment in control and giantin-knockdown cells were compared through western blotting analysis using total cell extracts.

# Appendix Figure S8

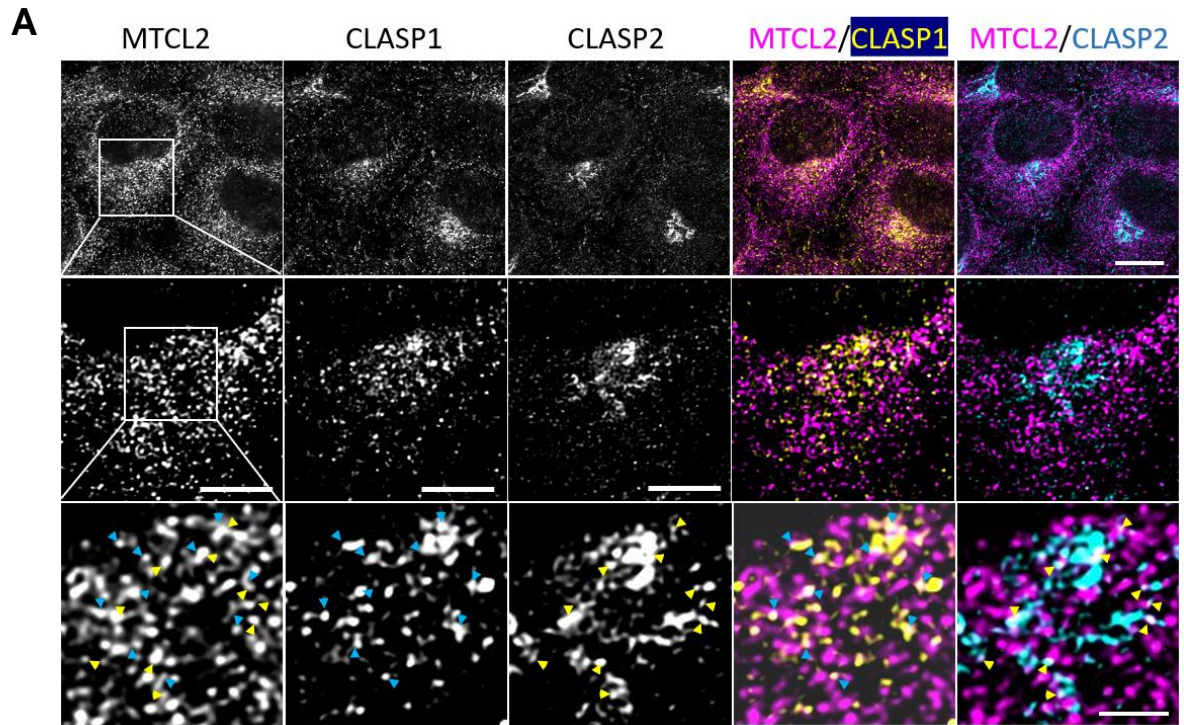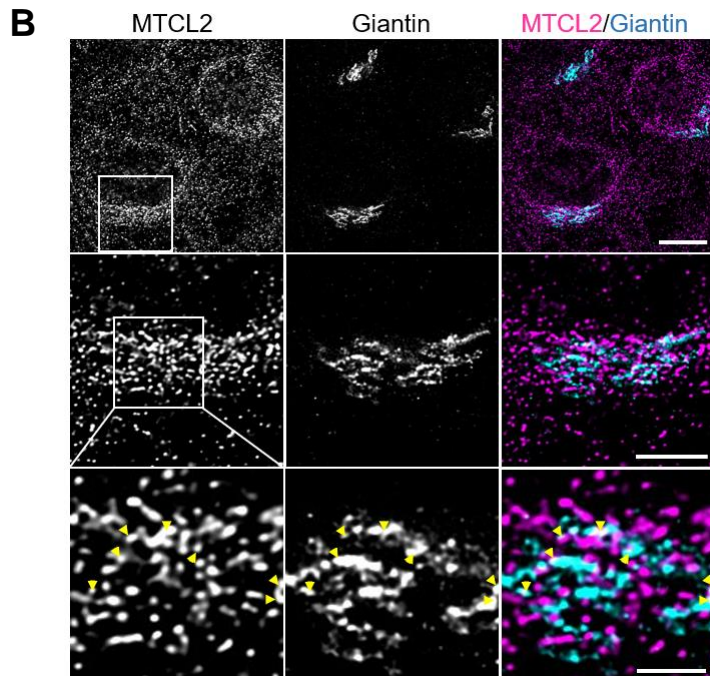

**Appendix Figure S8. Endogenous MTCL2 exhibited partial colocalization with CLASPs and giantin.**

Subcellular localization of endogenous MTCL2 in HeLa-K cells was compared with that of CLASPs (A) and giantin (B) using super-resolution microscopy. Boxed regions are serially enlarged in the middle and bottom panels. Arrowheads indicate the regions where each protein shows colocalization with MTCL2. Scale bars: 10  $\mu\text{m}$  (top), 5  $\mu\text{m}$  (middle), and 2  $\mu\text{m}$  (bottom).
